# Supplementary material for: Heterogeneous formation of polar stratospheric clouds – Part 2: Nucleation of ice on synoptic scales
Source: Copernicus journal article supplement (doi:10.5194/acp-13-10769-2013), 2013-11-06
Supplement: Supplementary file 44 [file acp-13-10769-2013-supplement.zip]

CALIPSO observation

Model result

with;  $\alpha_0 = 43^\circ$ ;  $P_{\text{pre}} = 5 \times 10^{-4} / \text{deg}$ ;  $\alpha = 60^\circ$ ;  $\gamma = 164 \text{ K}^3$ 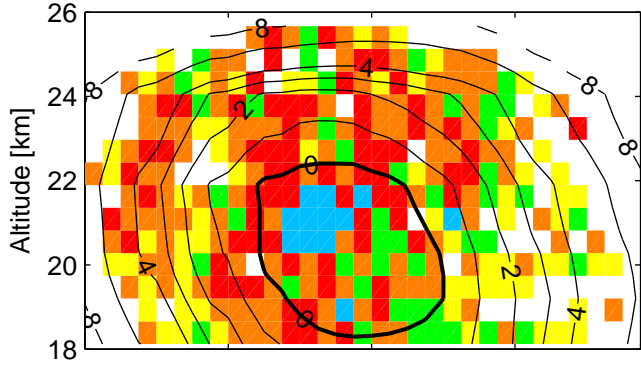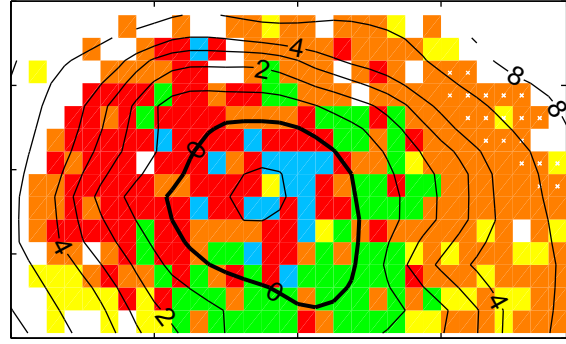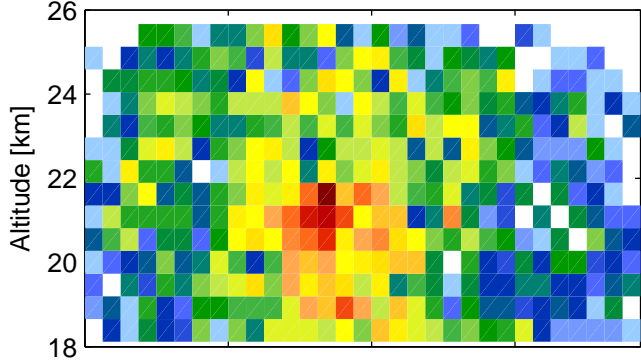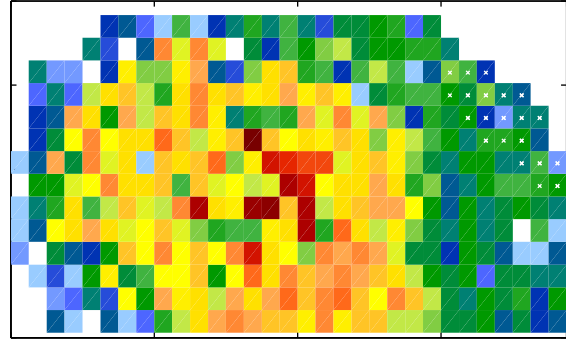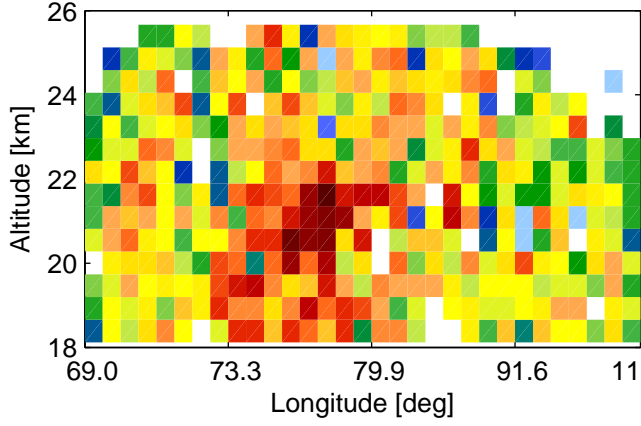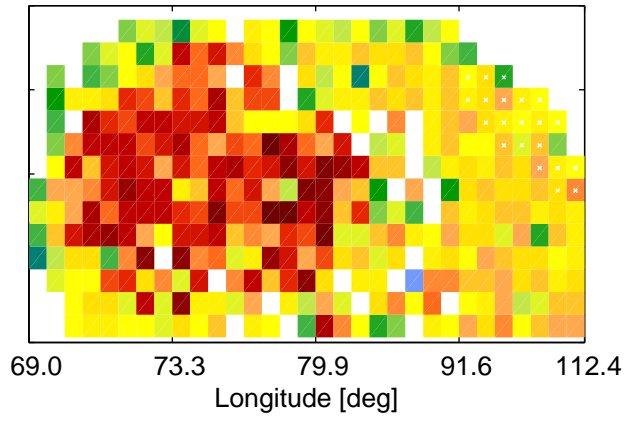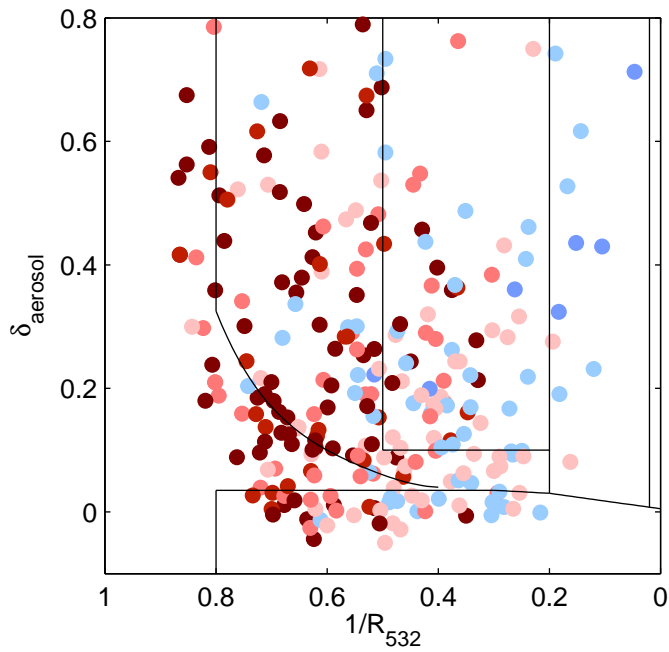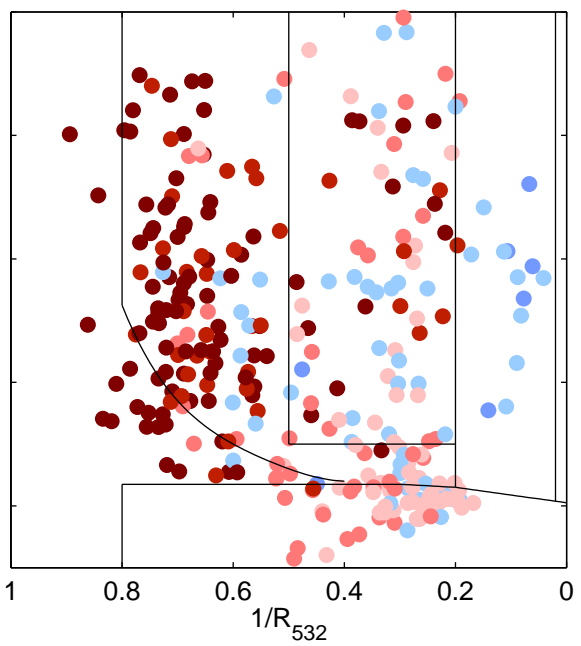 $R_{532} - 1$  $\beta_{\text{perp}} [\text{km}^{-1} \text{sr}^{-1}]$  $T - T_{\text{frost}} [\text{K}]$
