# Supplementary figures and images for: Heterogeneous formation of polar stratospheric clouds – Part 2: Nucleation of ice on synoptic scales
Source: Copernicus journal article supplement (doi:10.5194/acp-13-10769-2013), 2013-11-06

CALIPSO observation

Model result

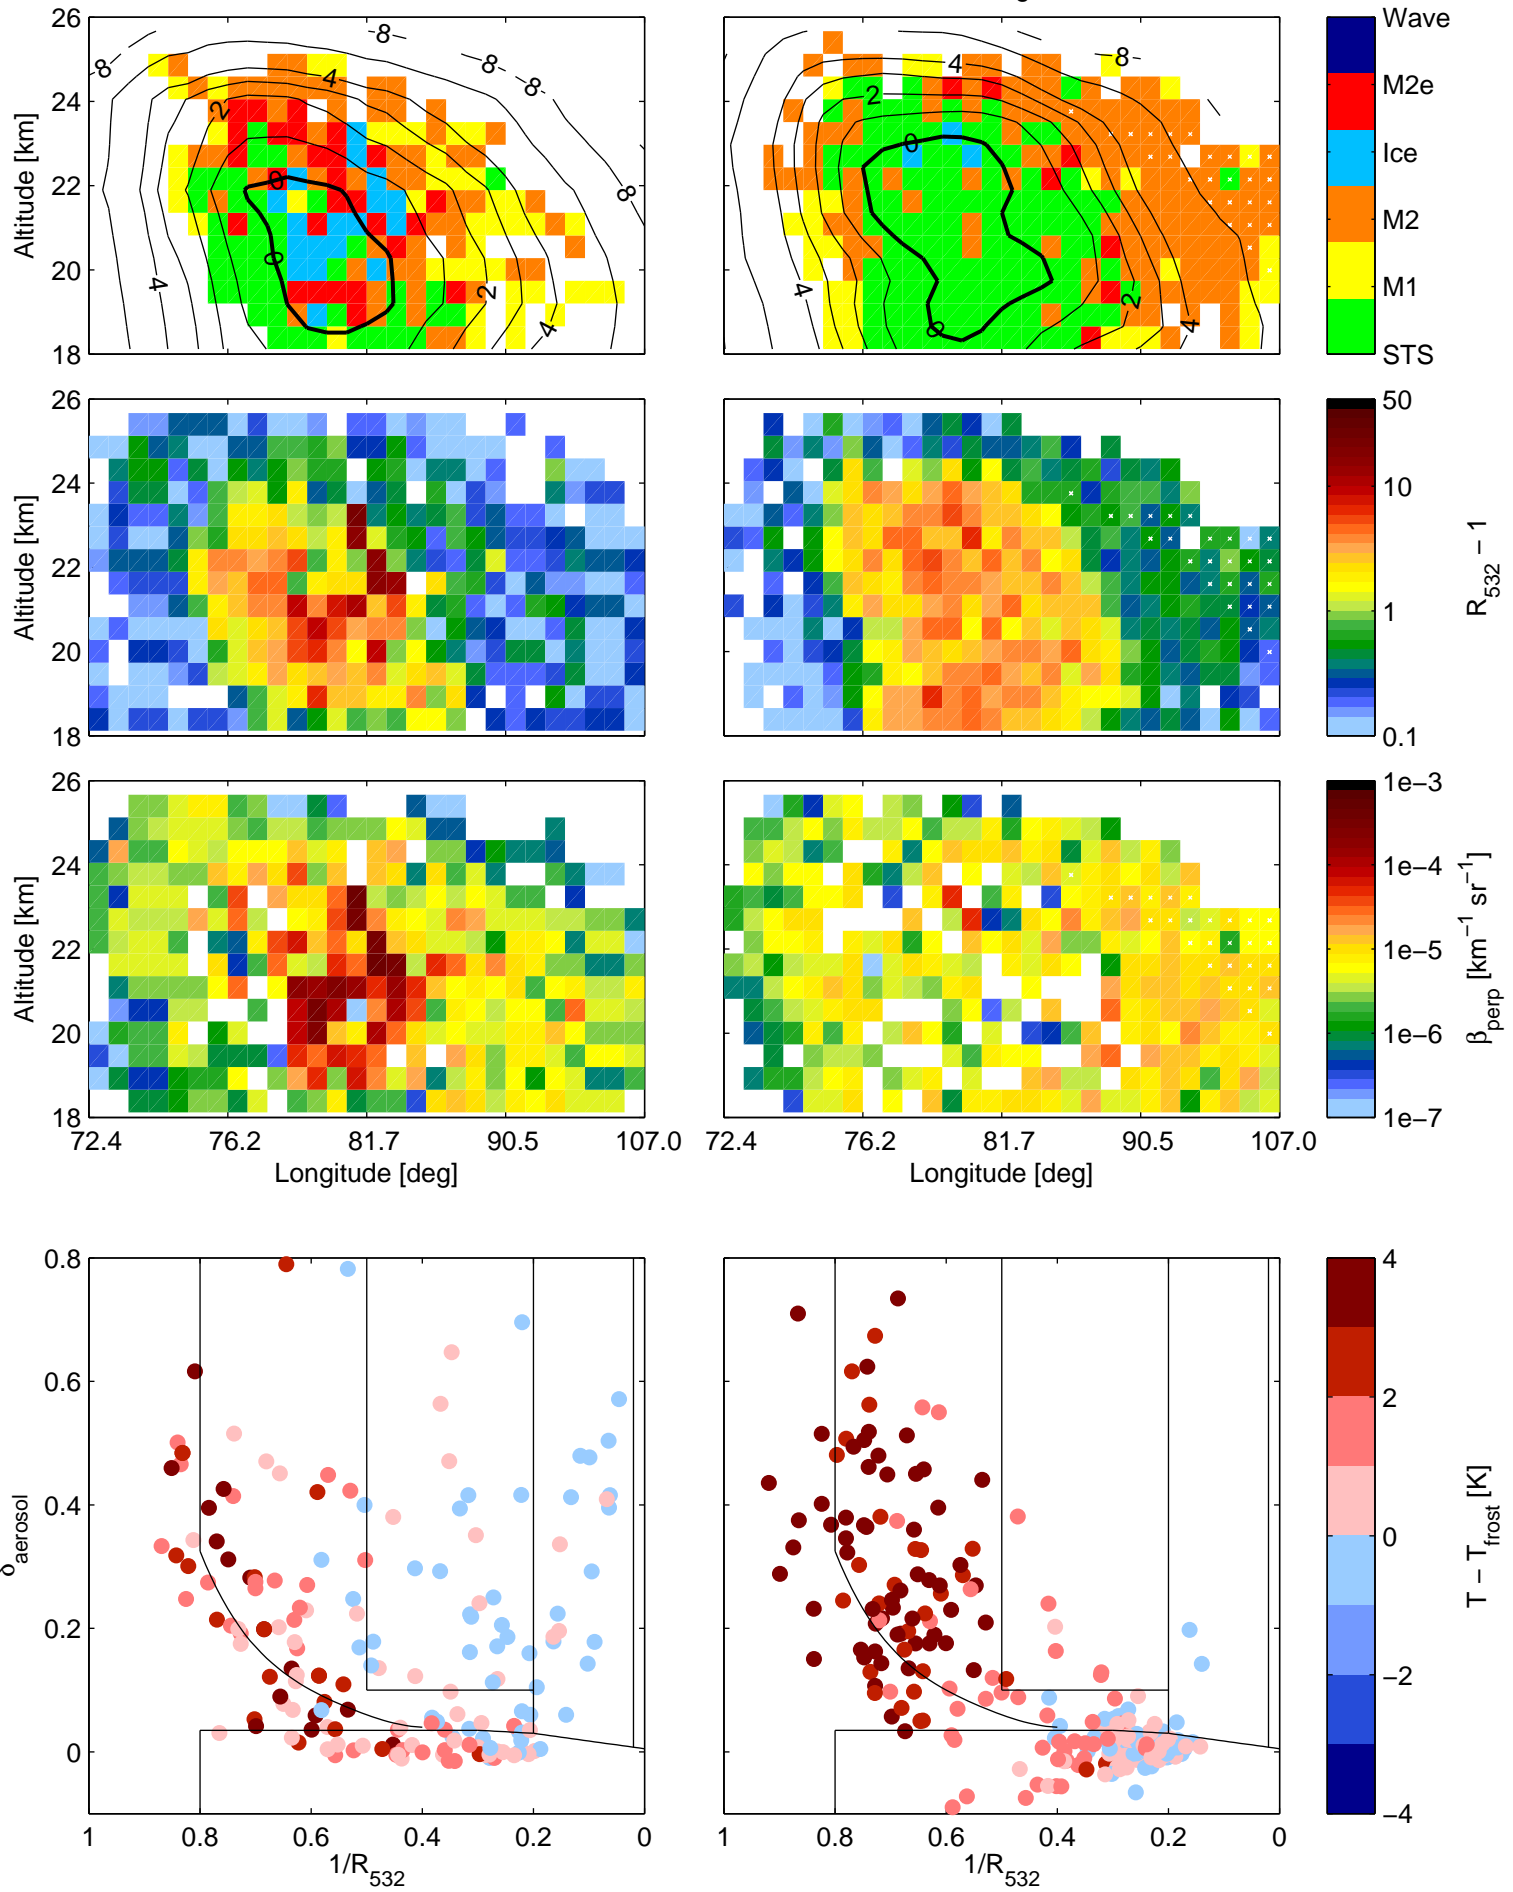

Supplement: Supplementary file 3 [file acp-13-10769-2013-supplement.zip]

### CALIPSO observation

Model result

with;  $\alpha_0 = 33^\circ$ ;  $P_{\text{pre}} = 5 \times 10^{-4}$  /deg;  $\alpha = 60^\circ$ ;  $\gamma = 164 \text{ K}^3$

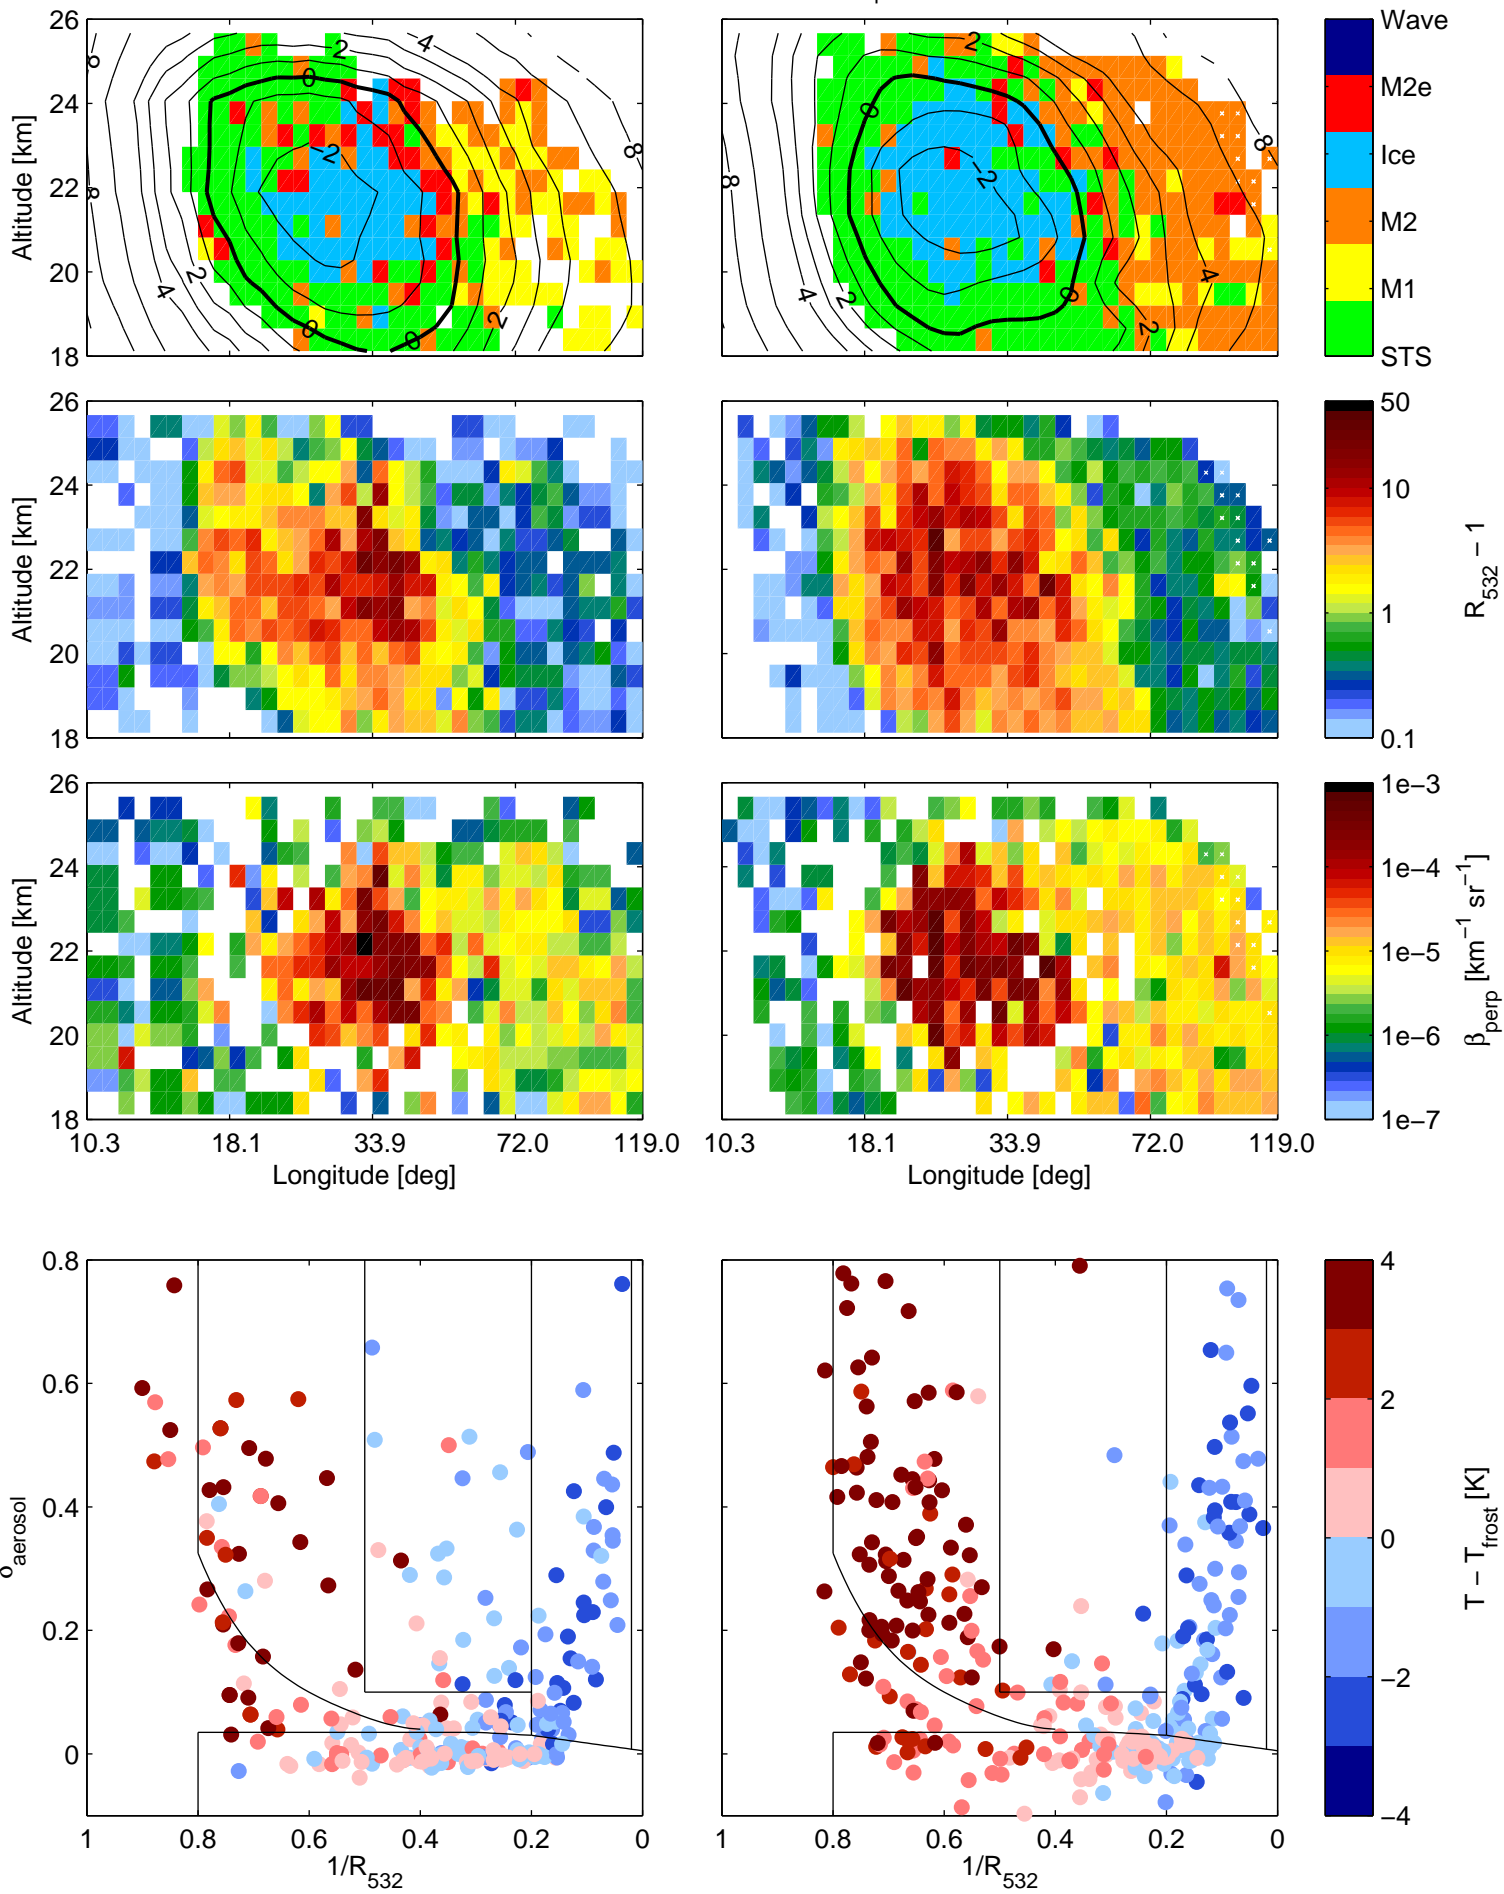

Supplement: Supplementary file 7 [file acp-13-10769-2013-supplement.zip]

CALIPSO observation

Model result

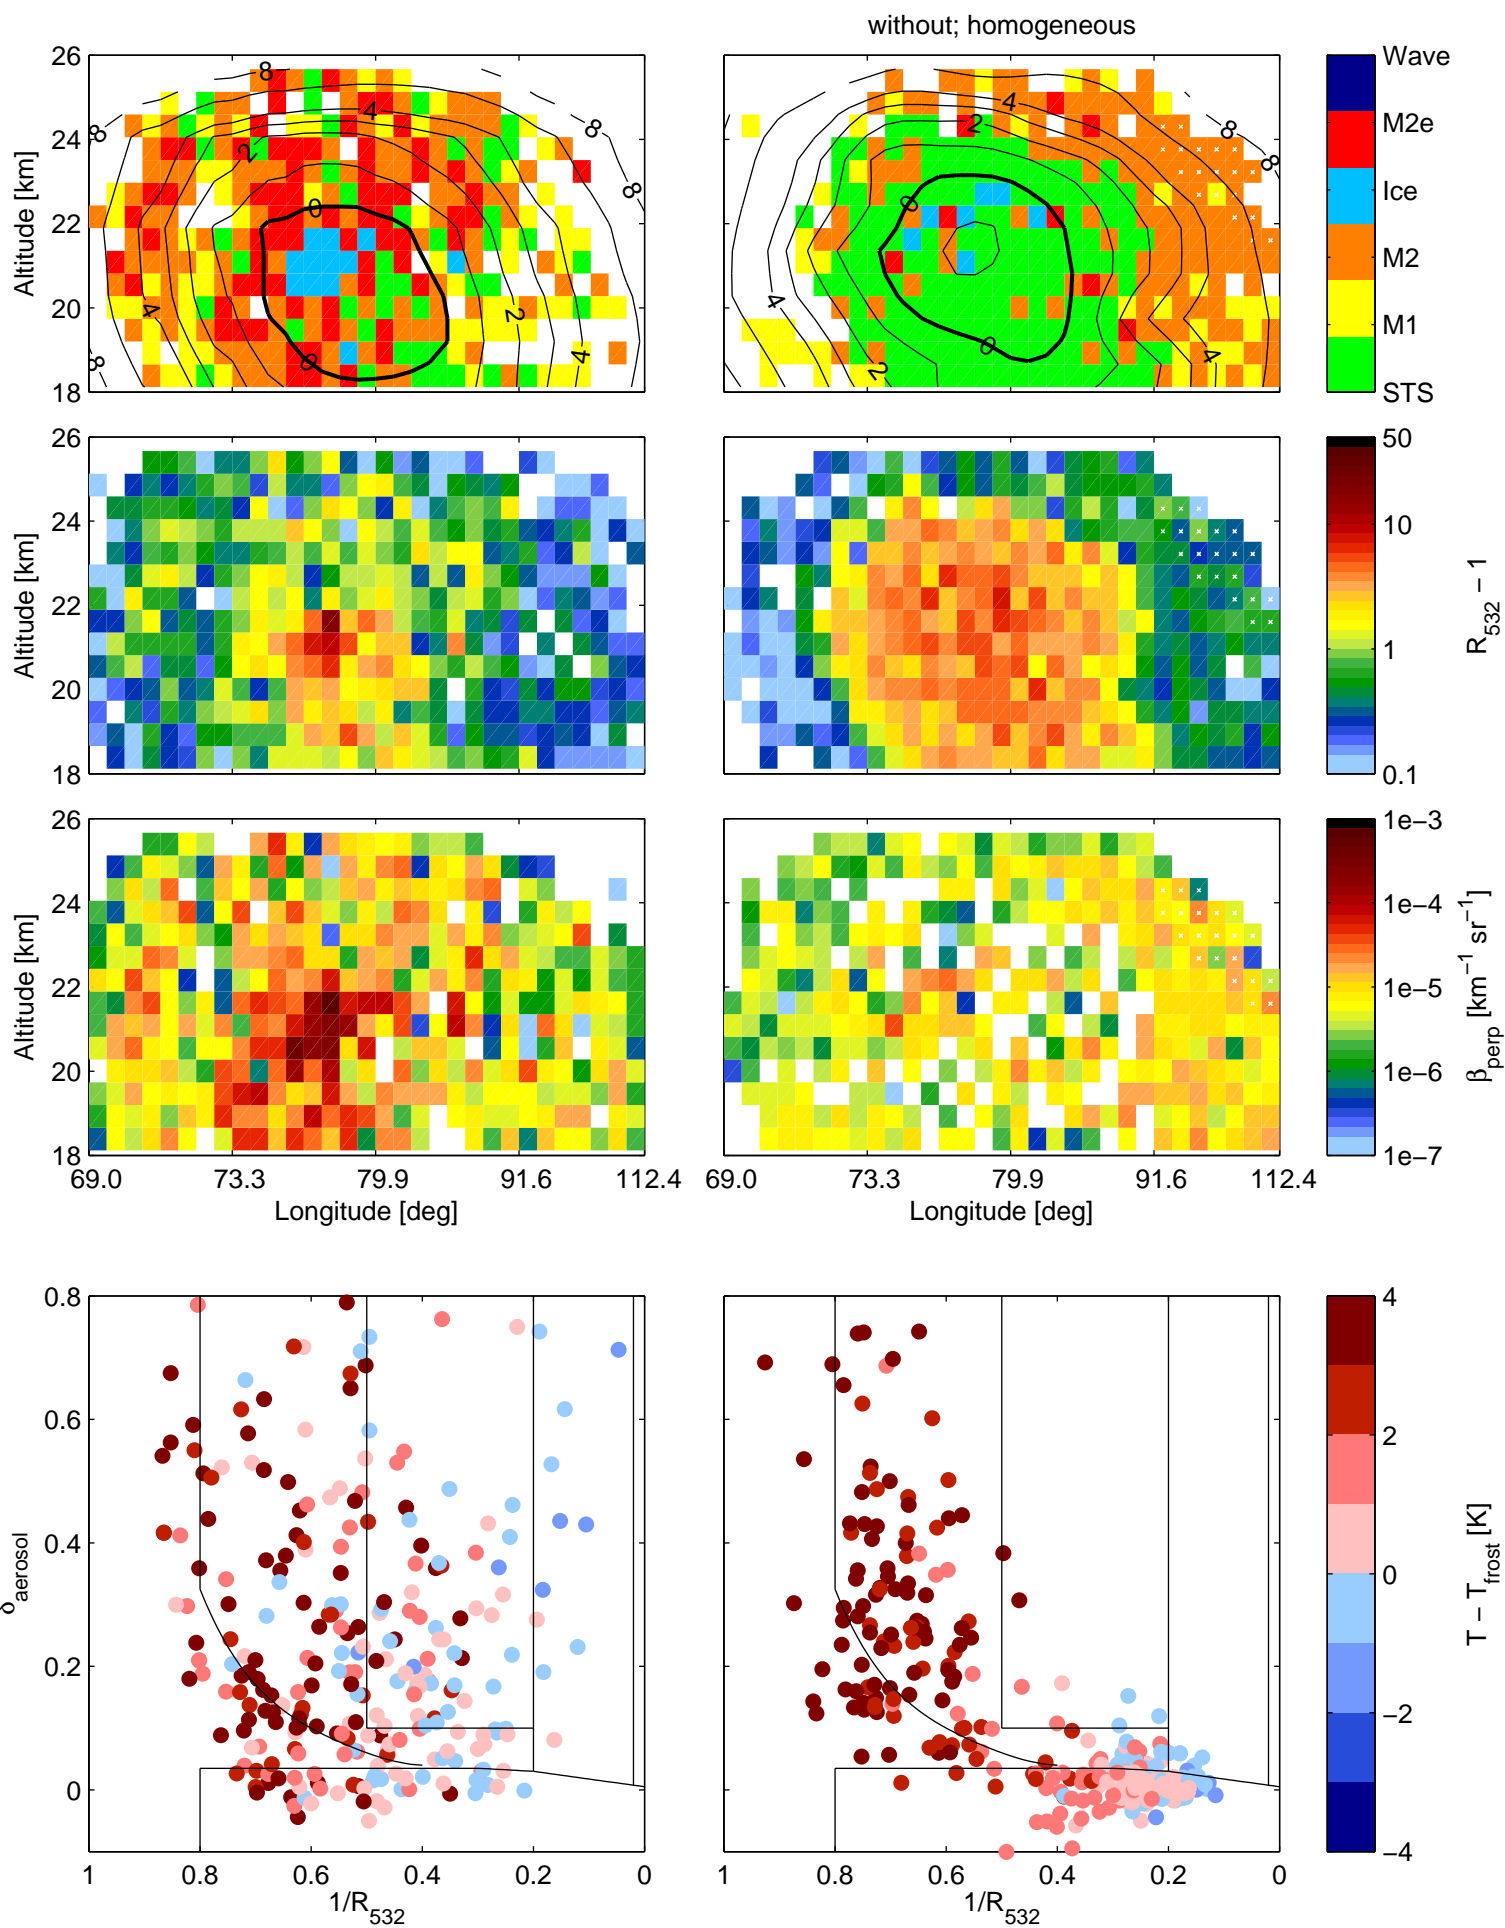

Supplement: Supplementary file 12 [file acp-13-10769-2013-supplement.zip]

CALIPSO observation

Model result

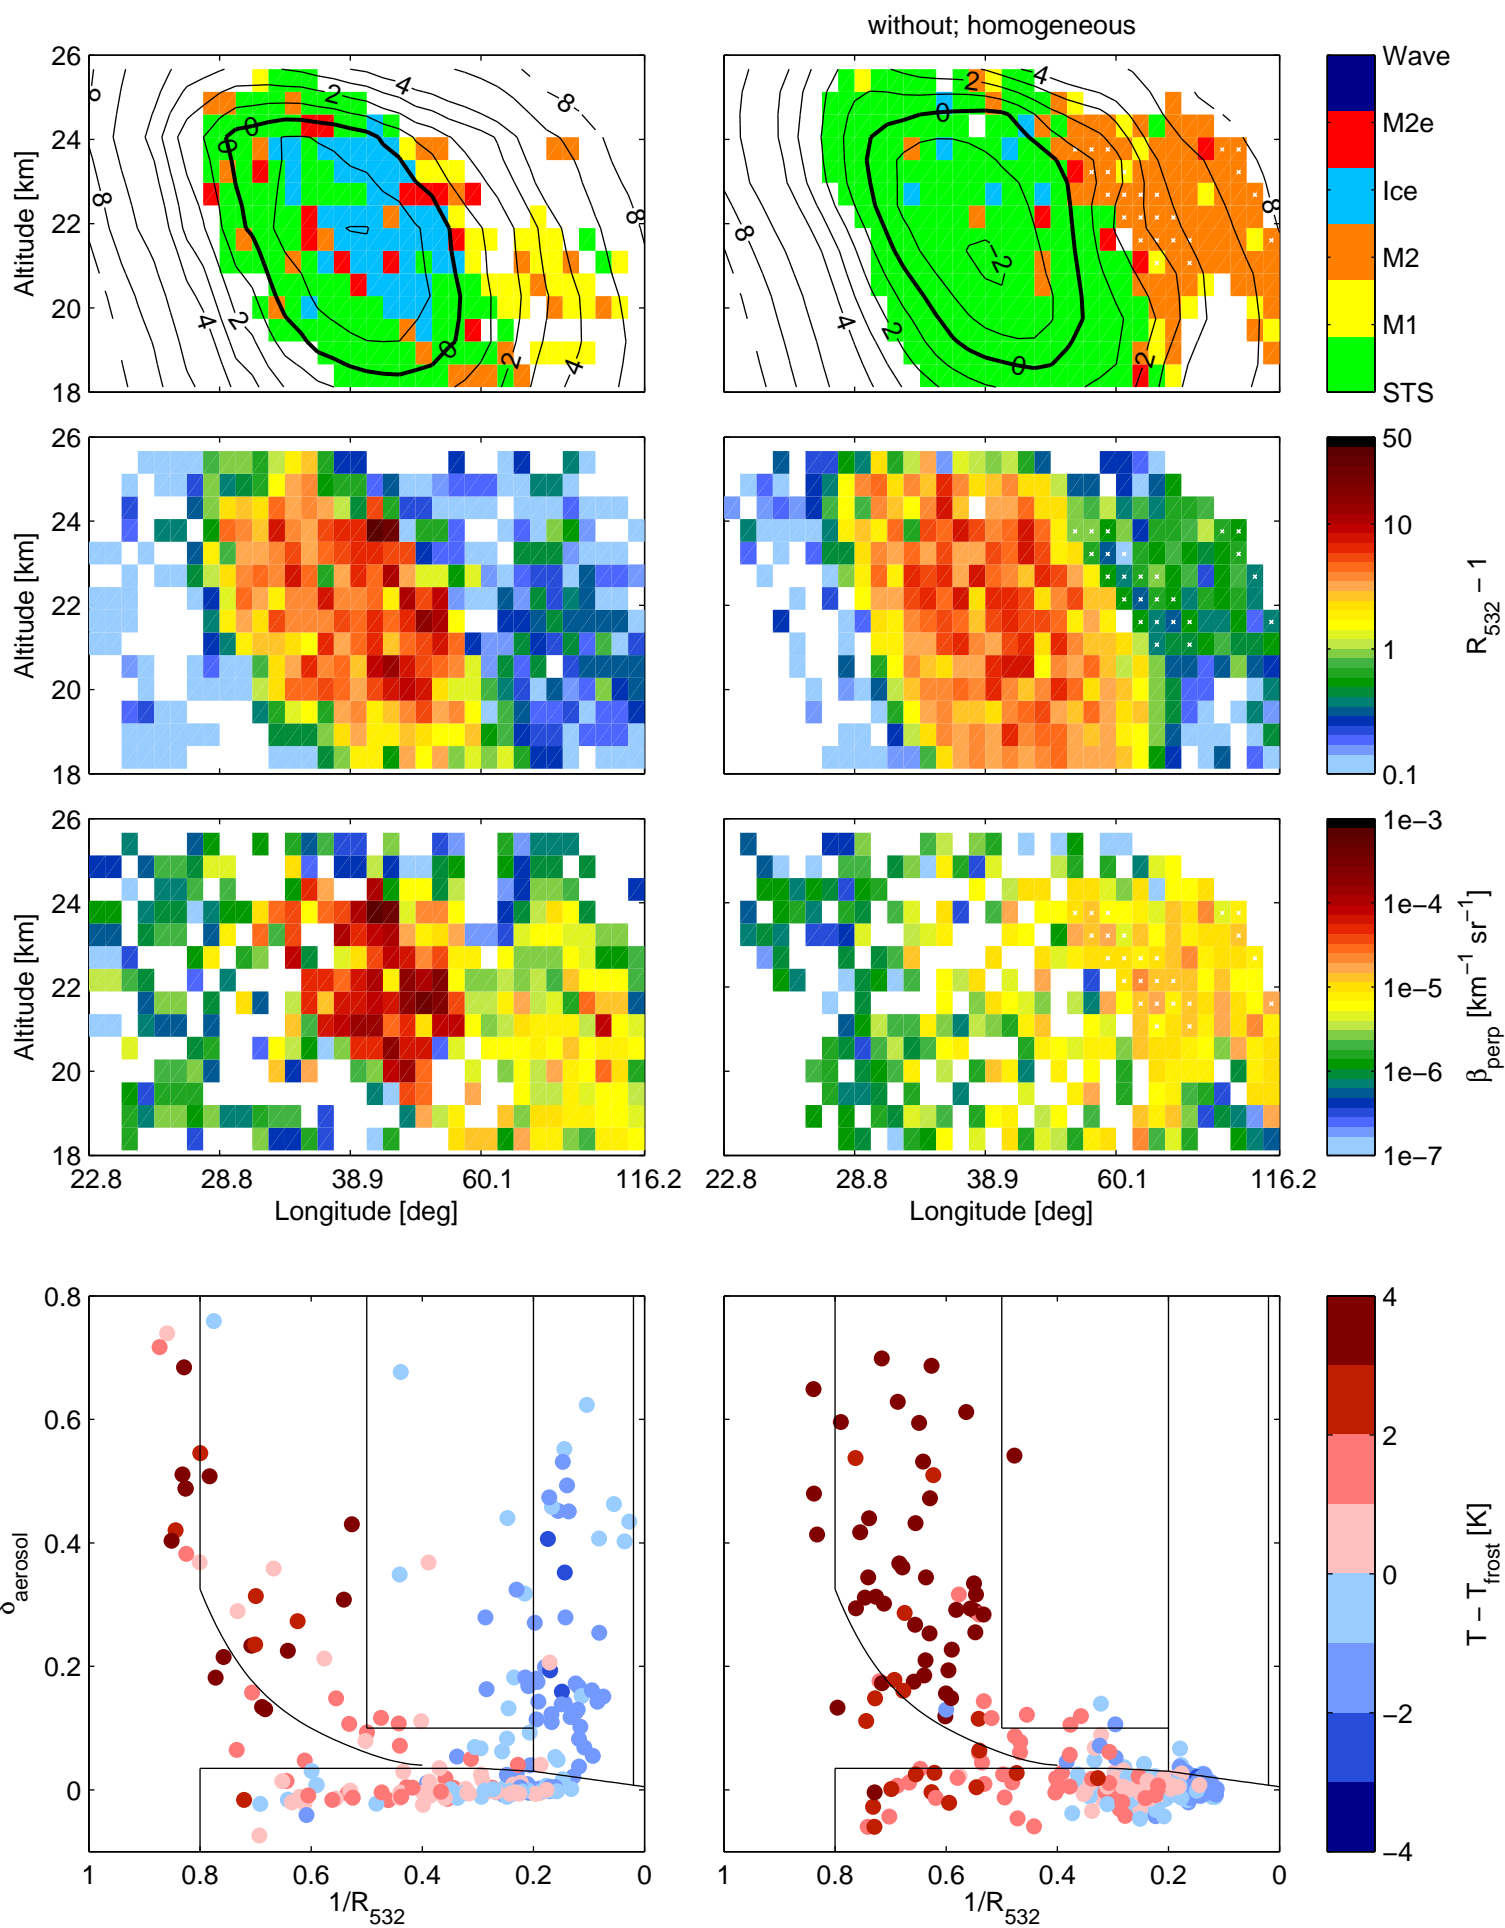

Supplement: Supplementary file 15 [file acp-13-10769-2013-supplement.zip]

CALIPSO observation

Model result

with; homogeneous

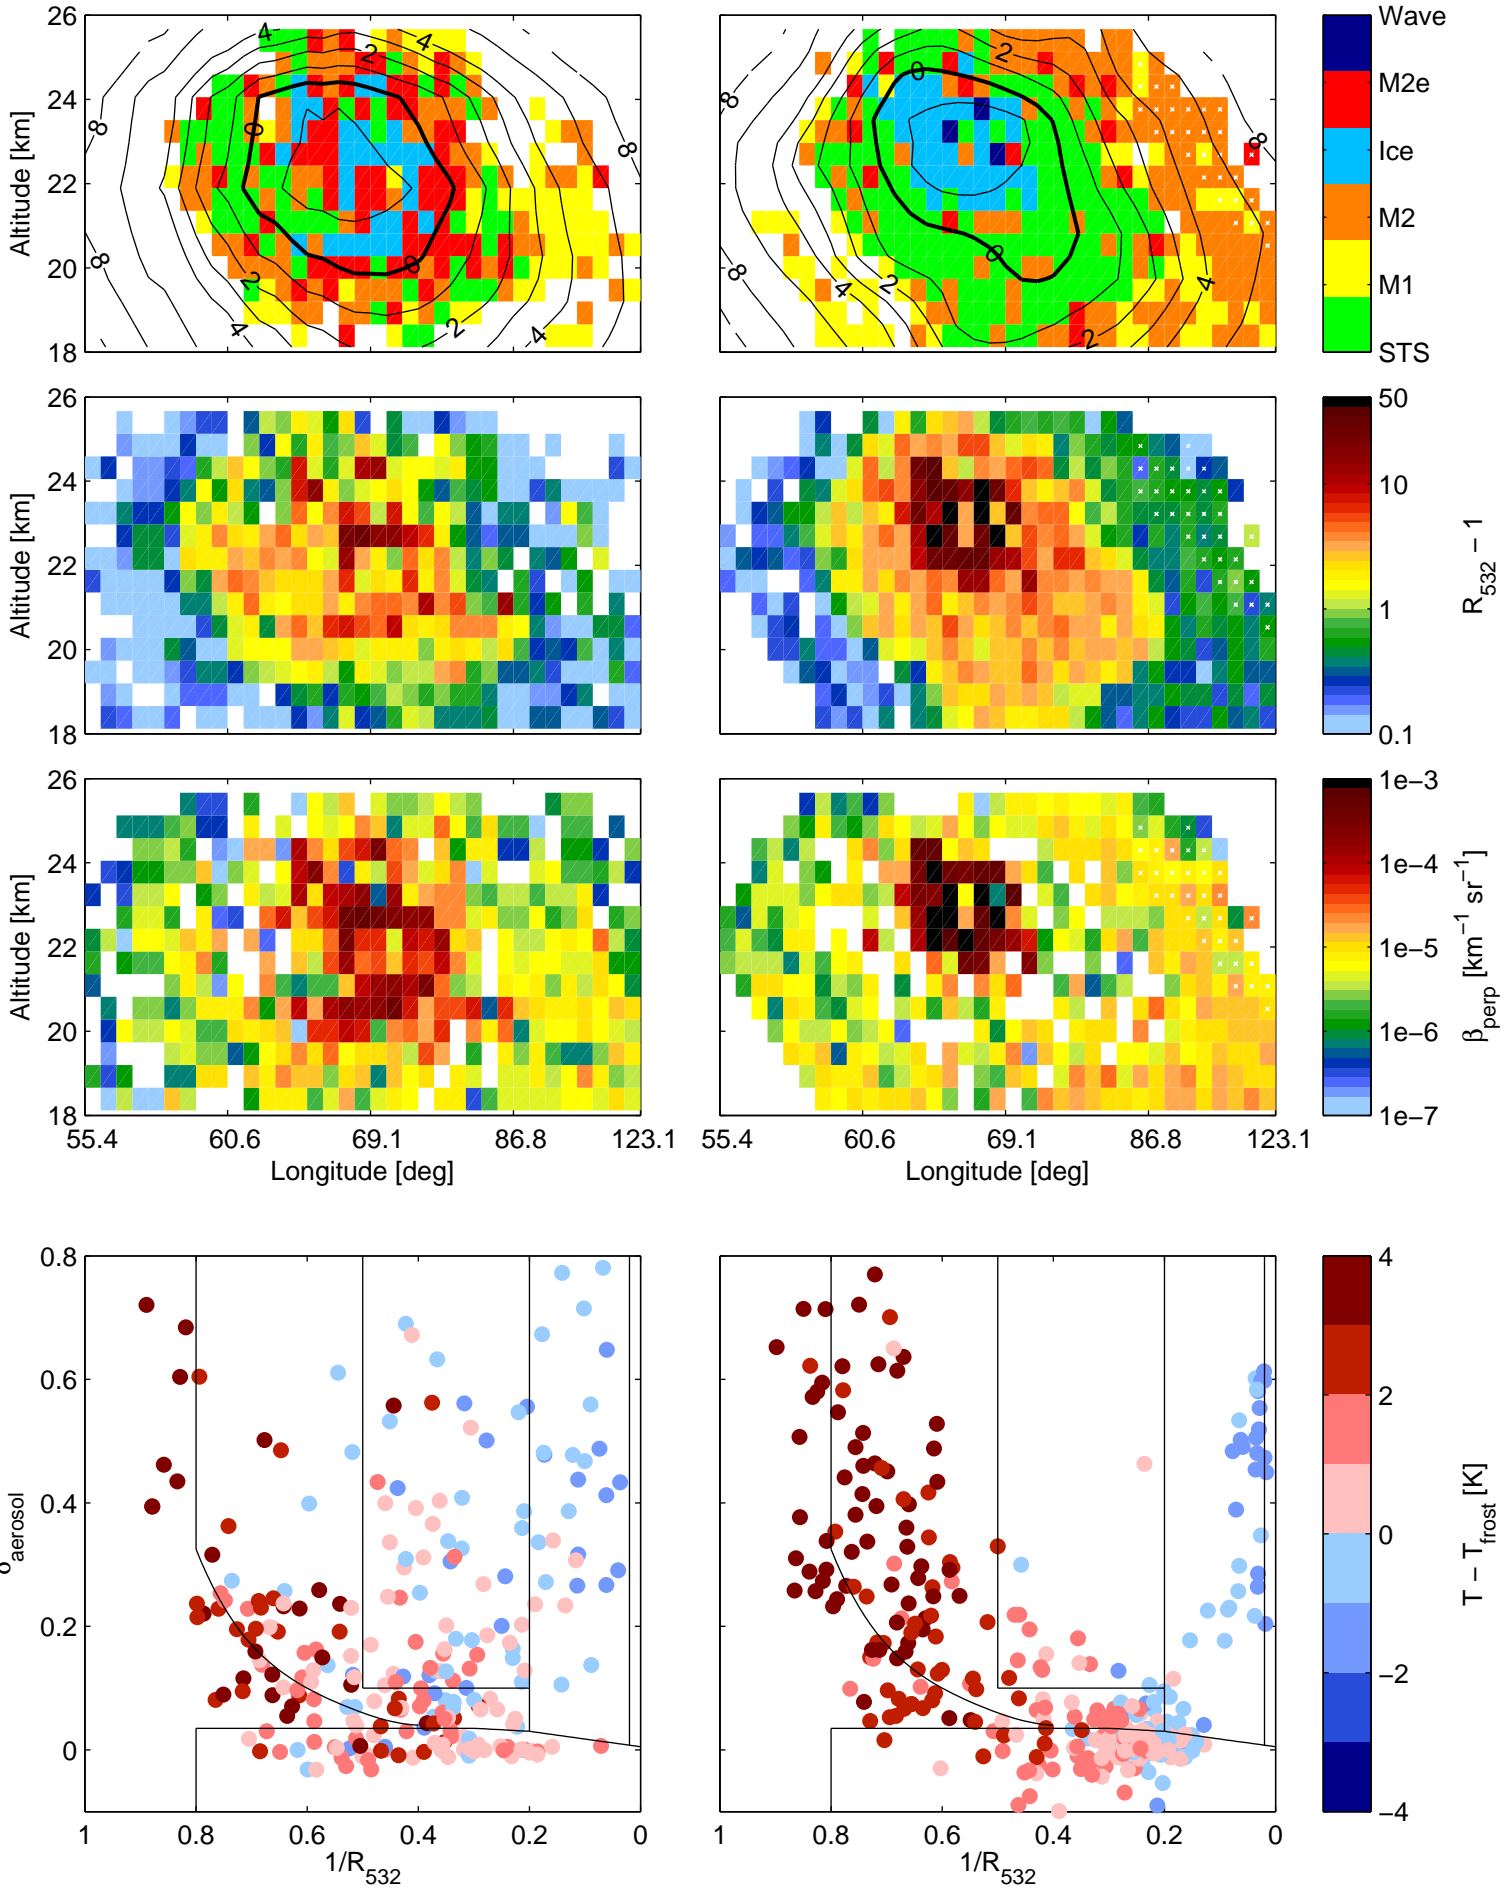

Supplement: Supplementary file 21 [file acp-13-10769-2013-supplement.zip]

CALIPSO observation

Model result

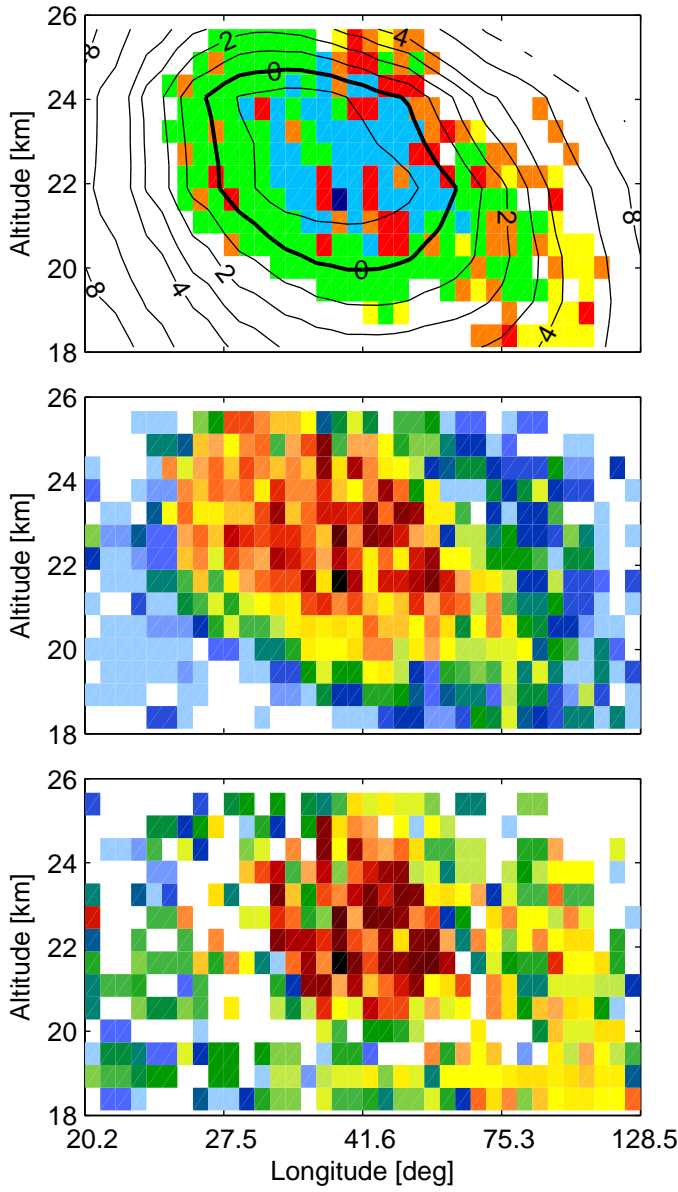

without; homogeneous

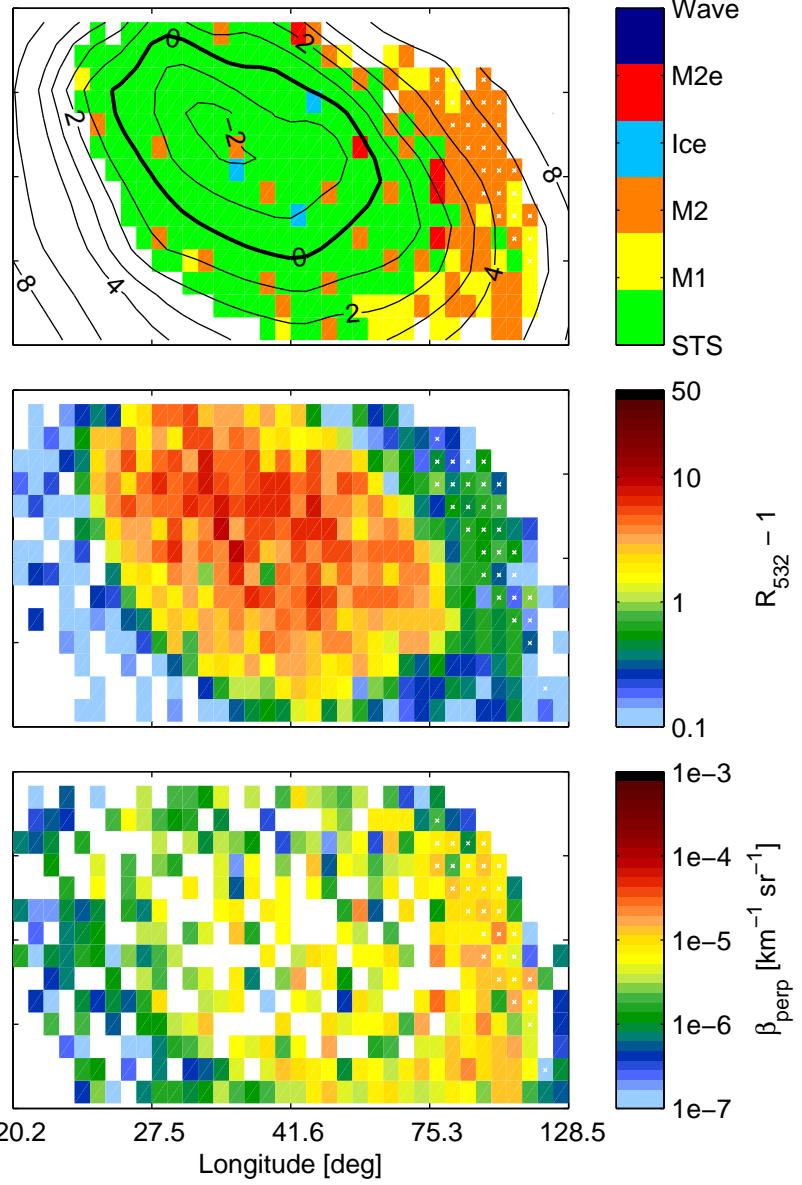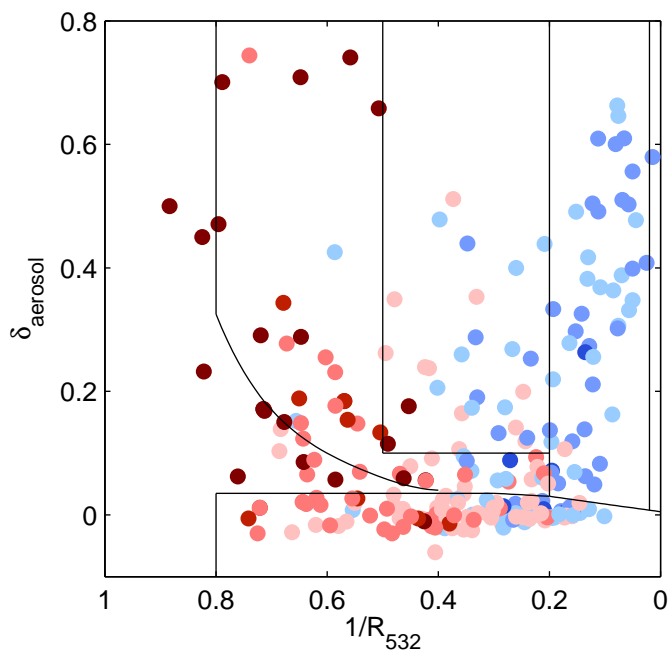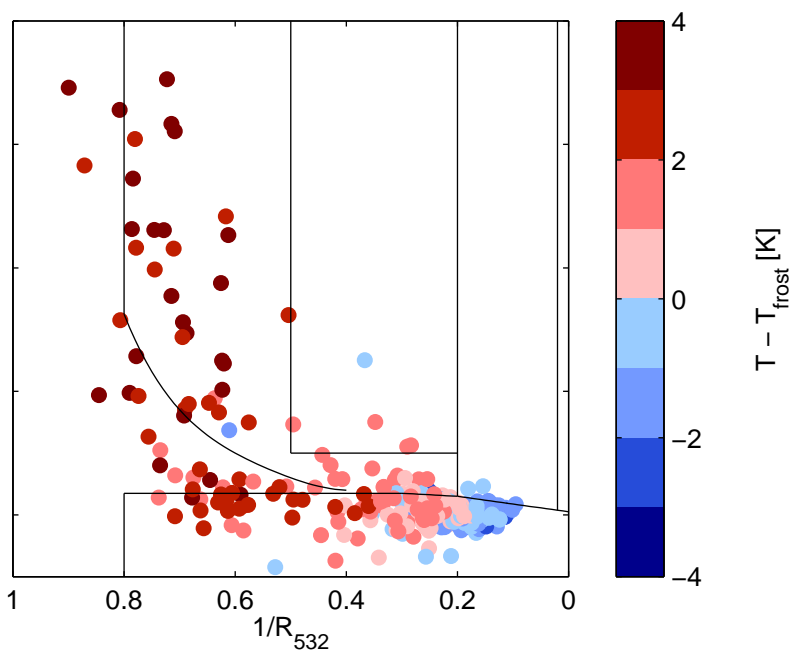

Supplement: Supplementary file 22 [file acp-13-10769-2013-supplement.zip]

CALIPSO observation

Model result

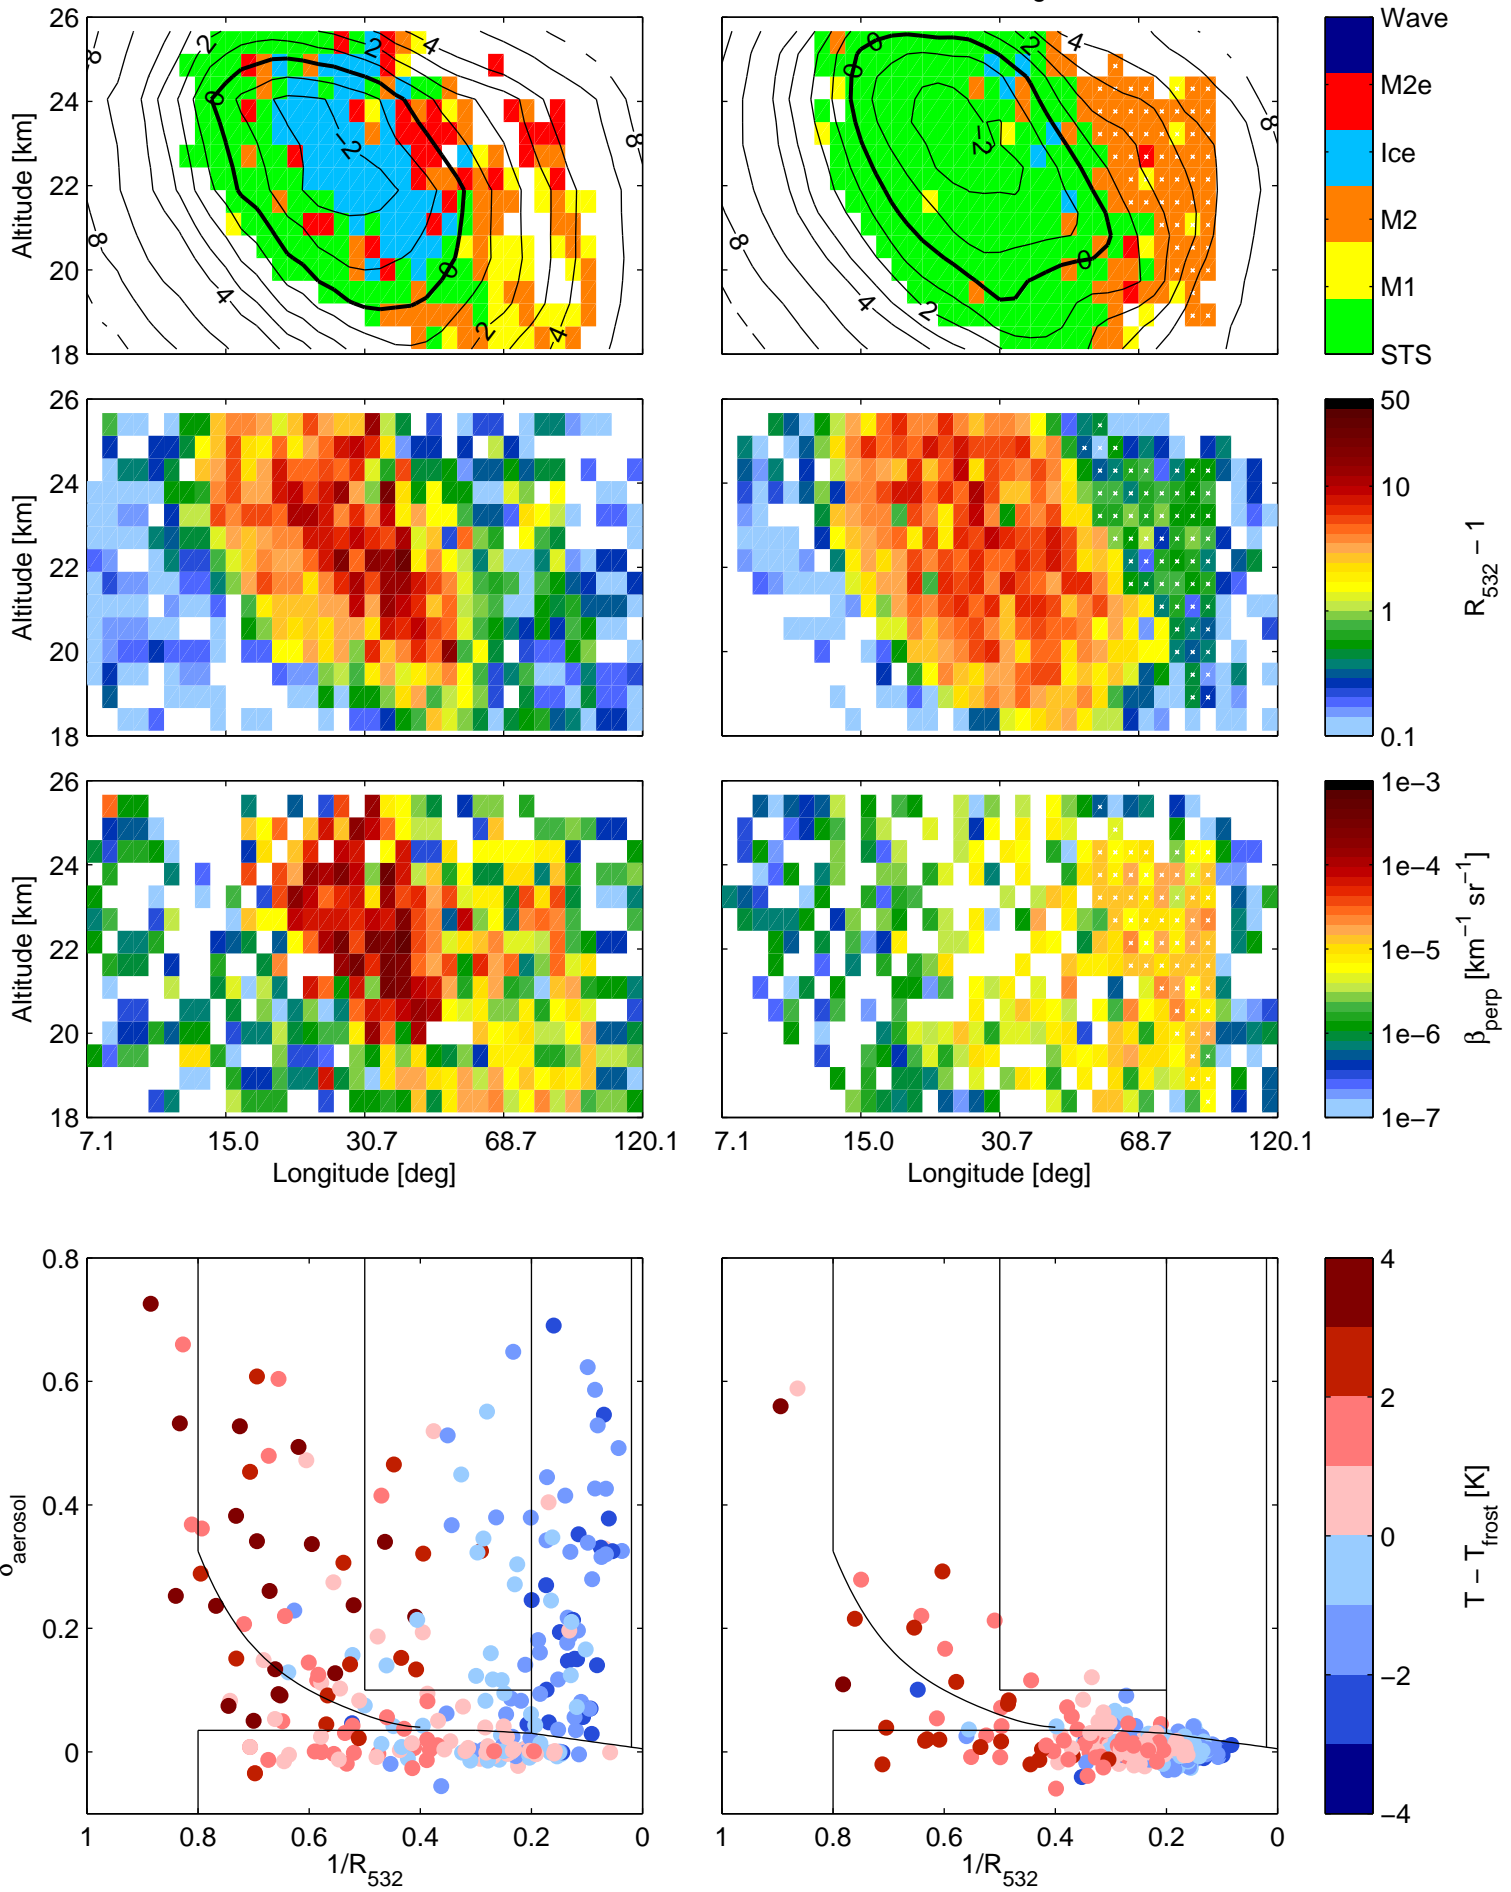

Supplement: Supplementary file 26 [file acp-13-10769-2013-supplement.zip]

CALIPSO observation

Model result

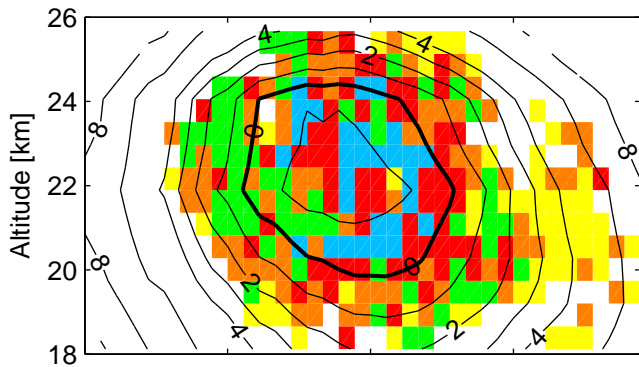

without; homogeneous

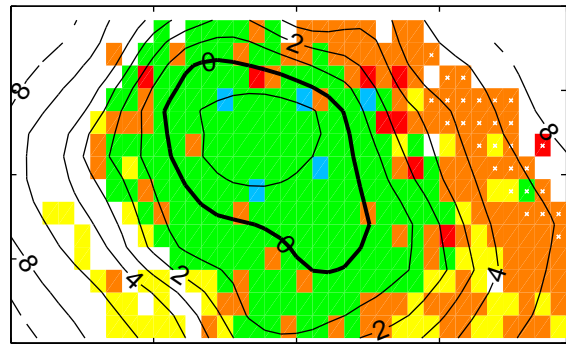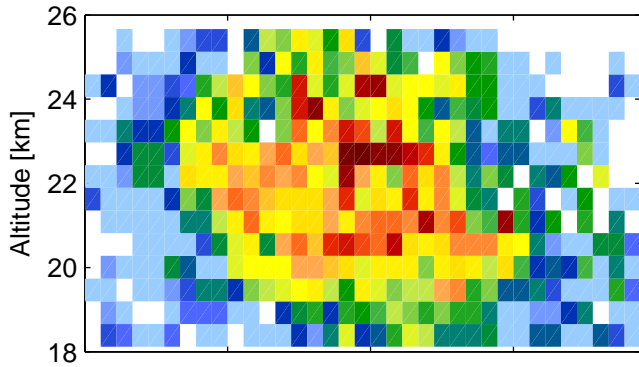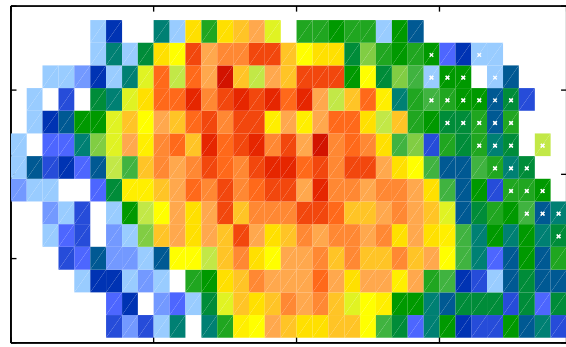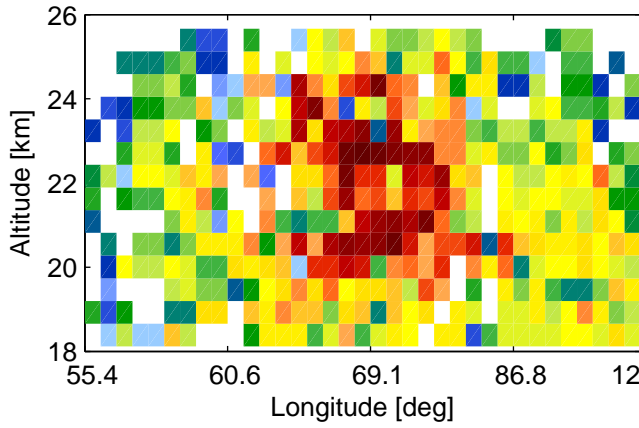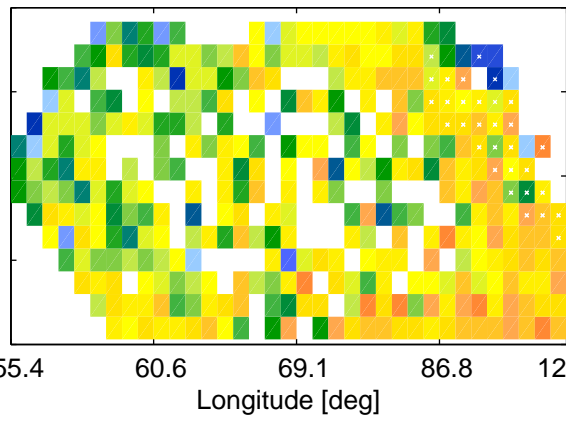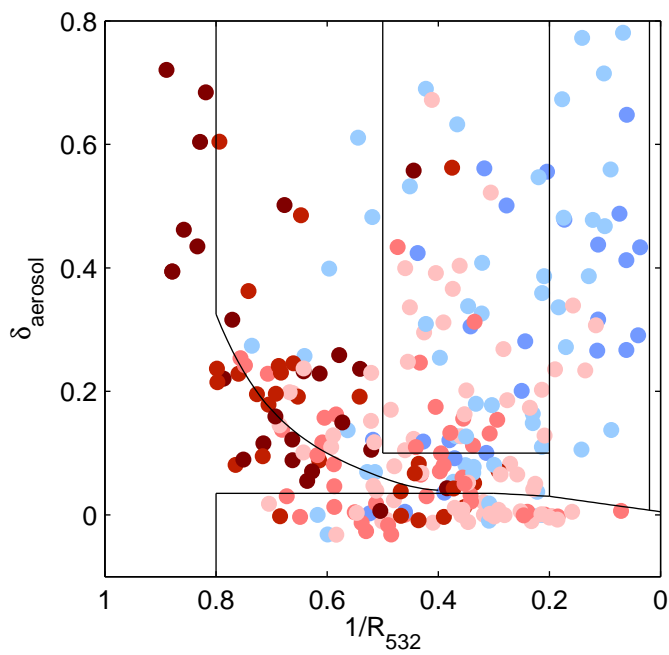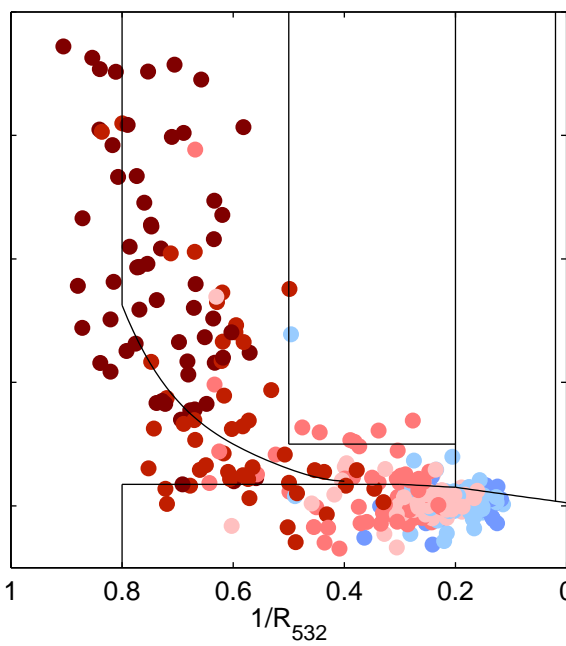

Supplement: Supplementary file 31 [file acp-13-10769-2013-supplement.zip]

CALIPSO observation

Model result

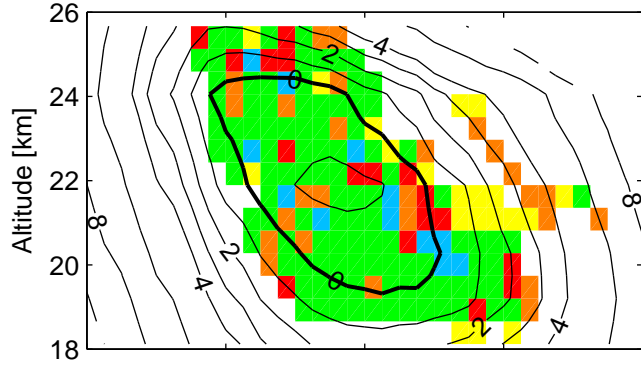

with; homogeneous

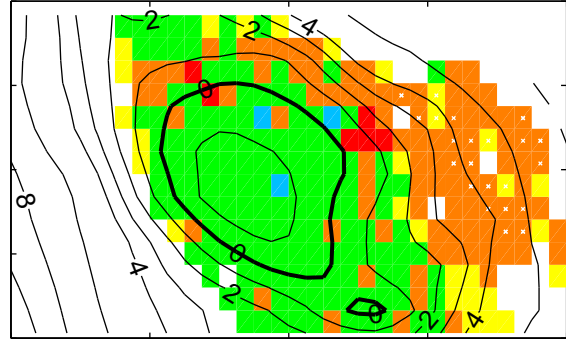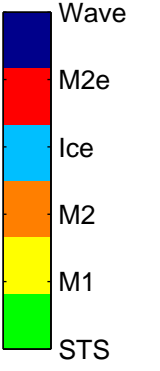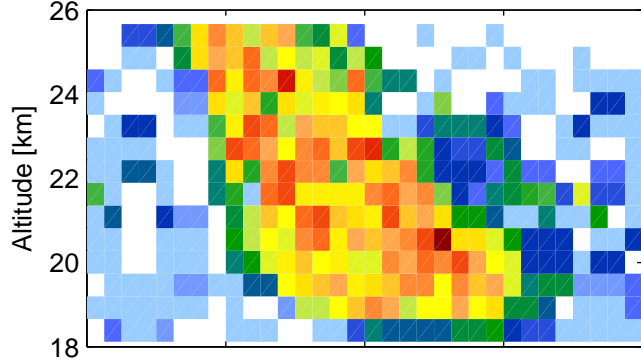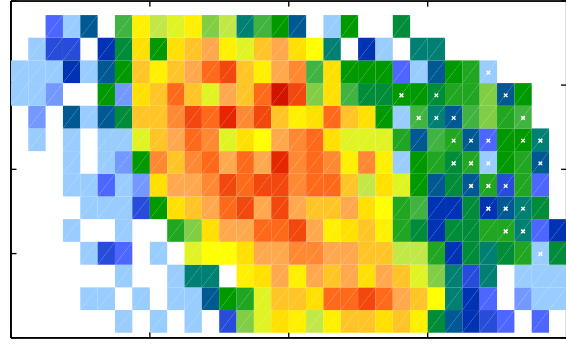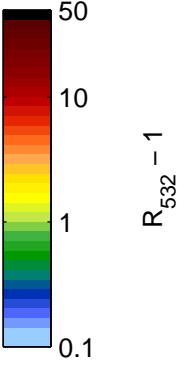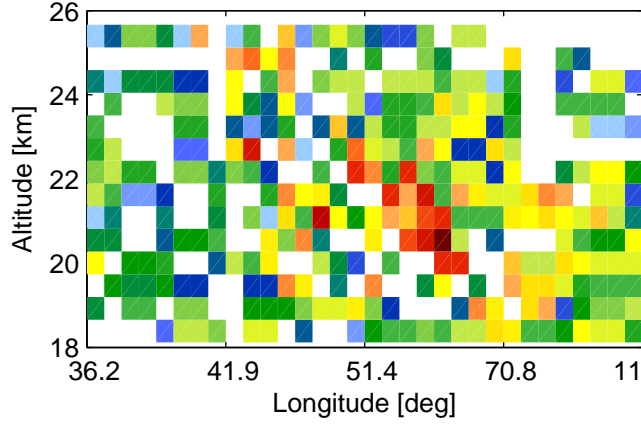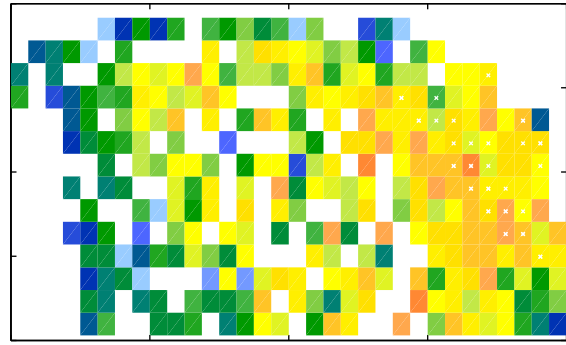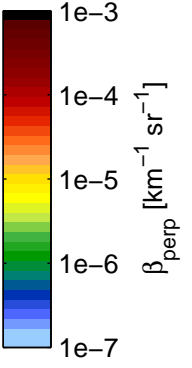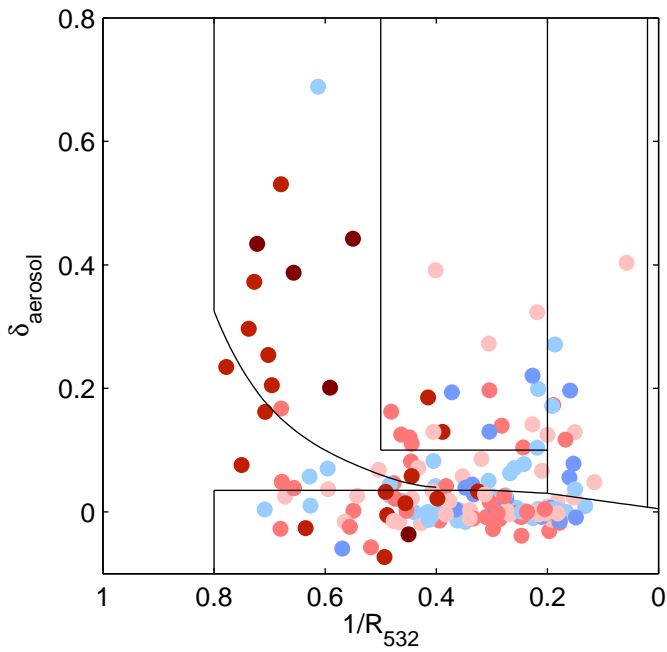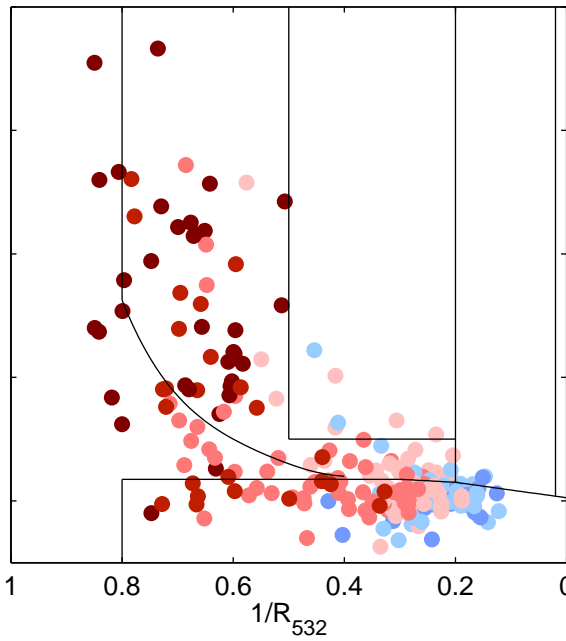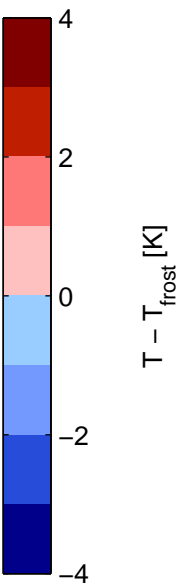

Supplement: Supplementary file 32 [file acp-13-10769-2013-supplement.zip]

CALIPSO observation

Model result

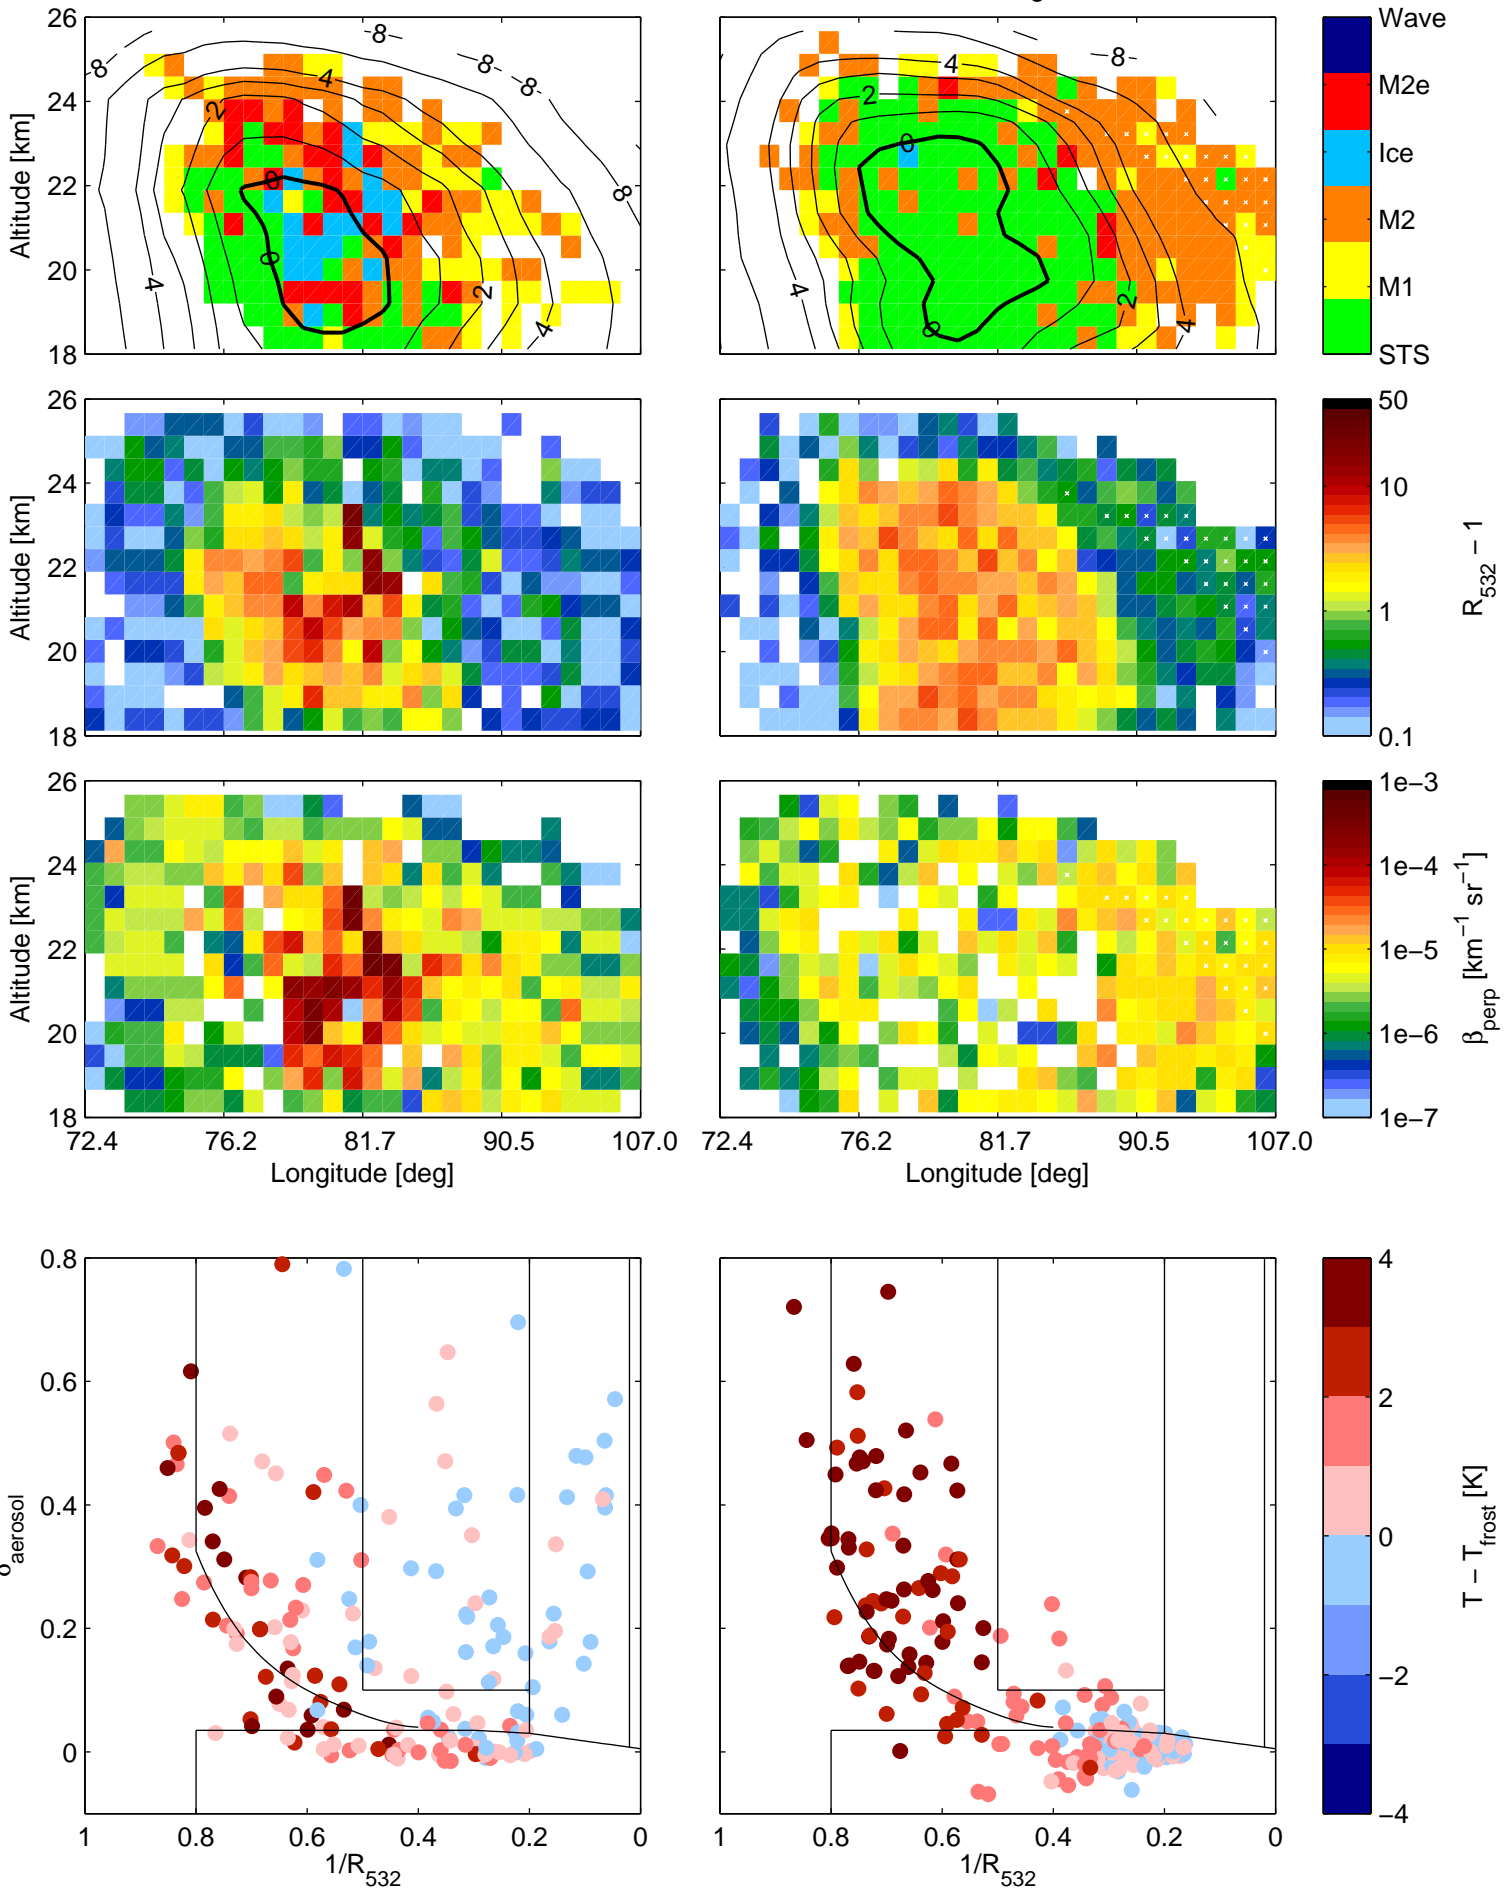

Supplement: Supplementary file 38 [file acp-13-10769-2013-supplement.zip]

CALIPSO observation

Model result

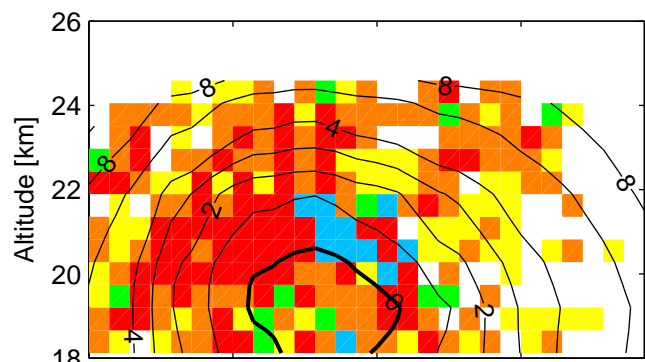

without; homogeneous

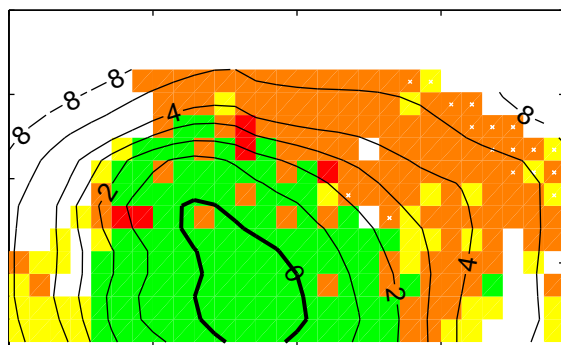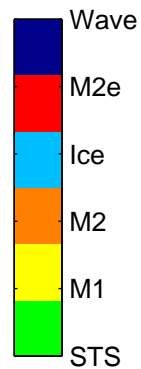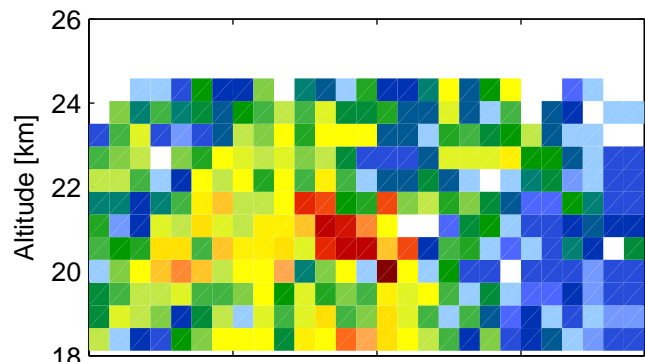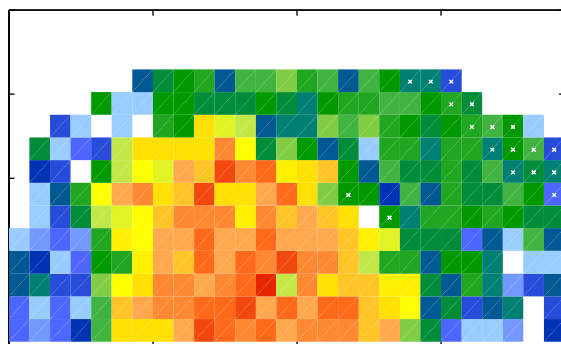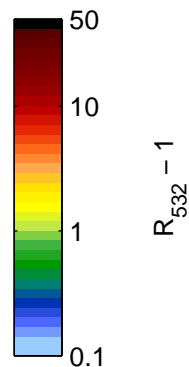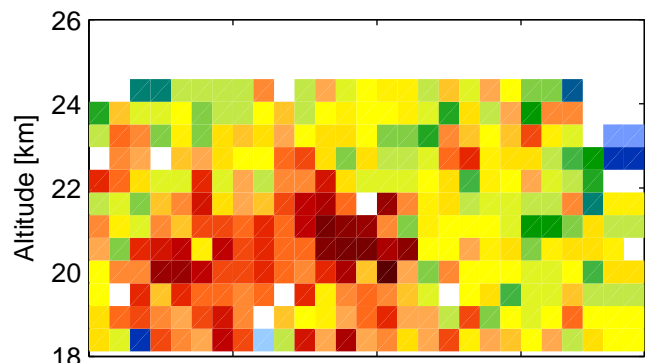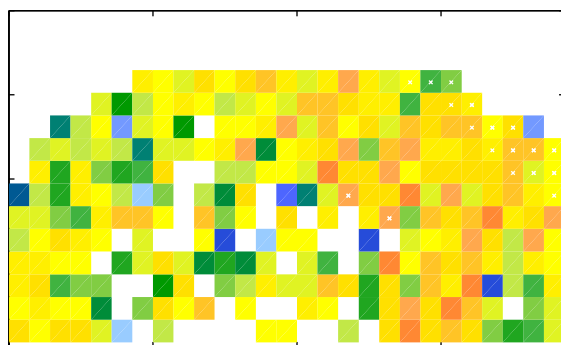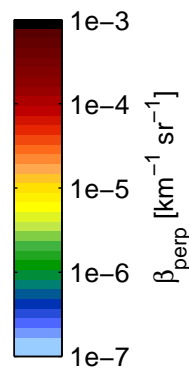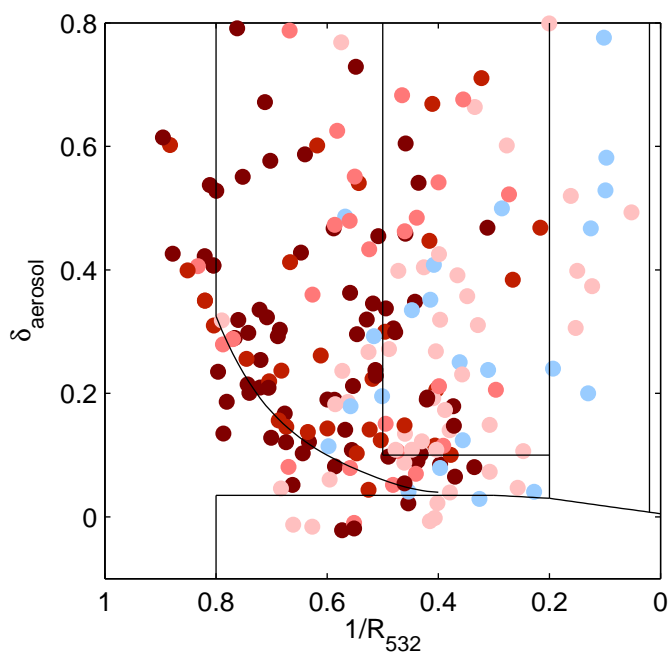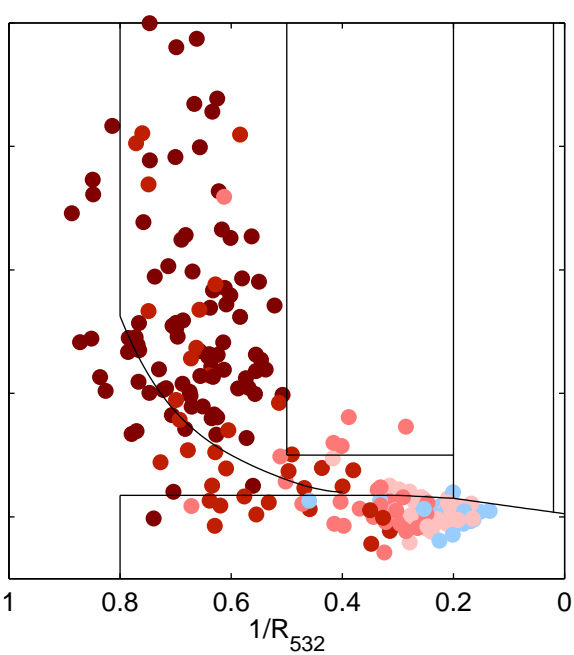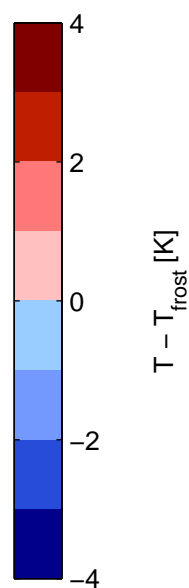

Supplement: Supplementary file 42 [file acp-13-10769-2013-supplement.zip]

CALIPSO observation

Model result

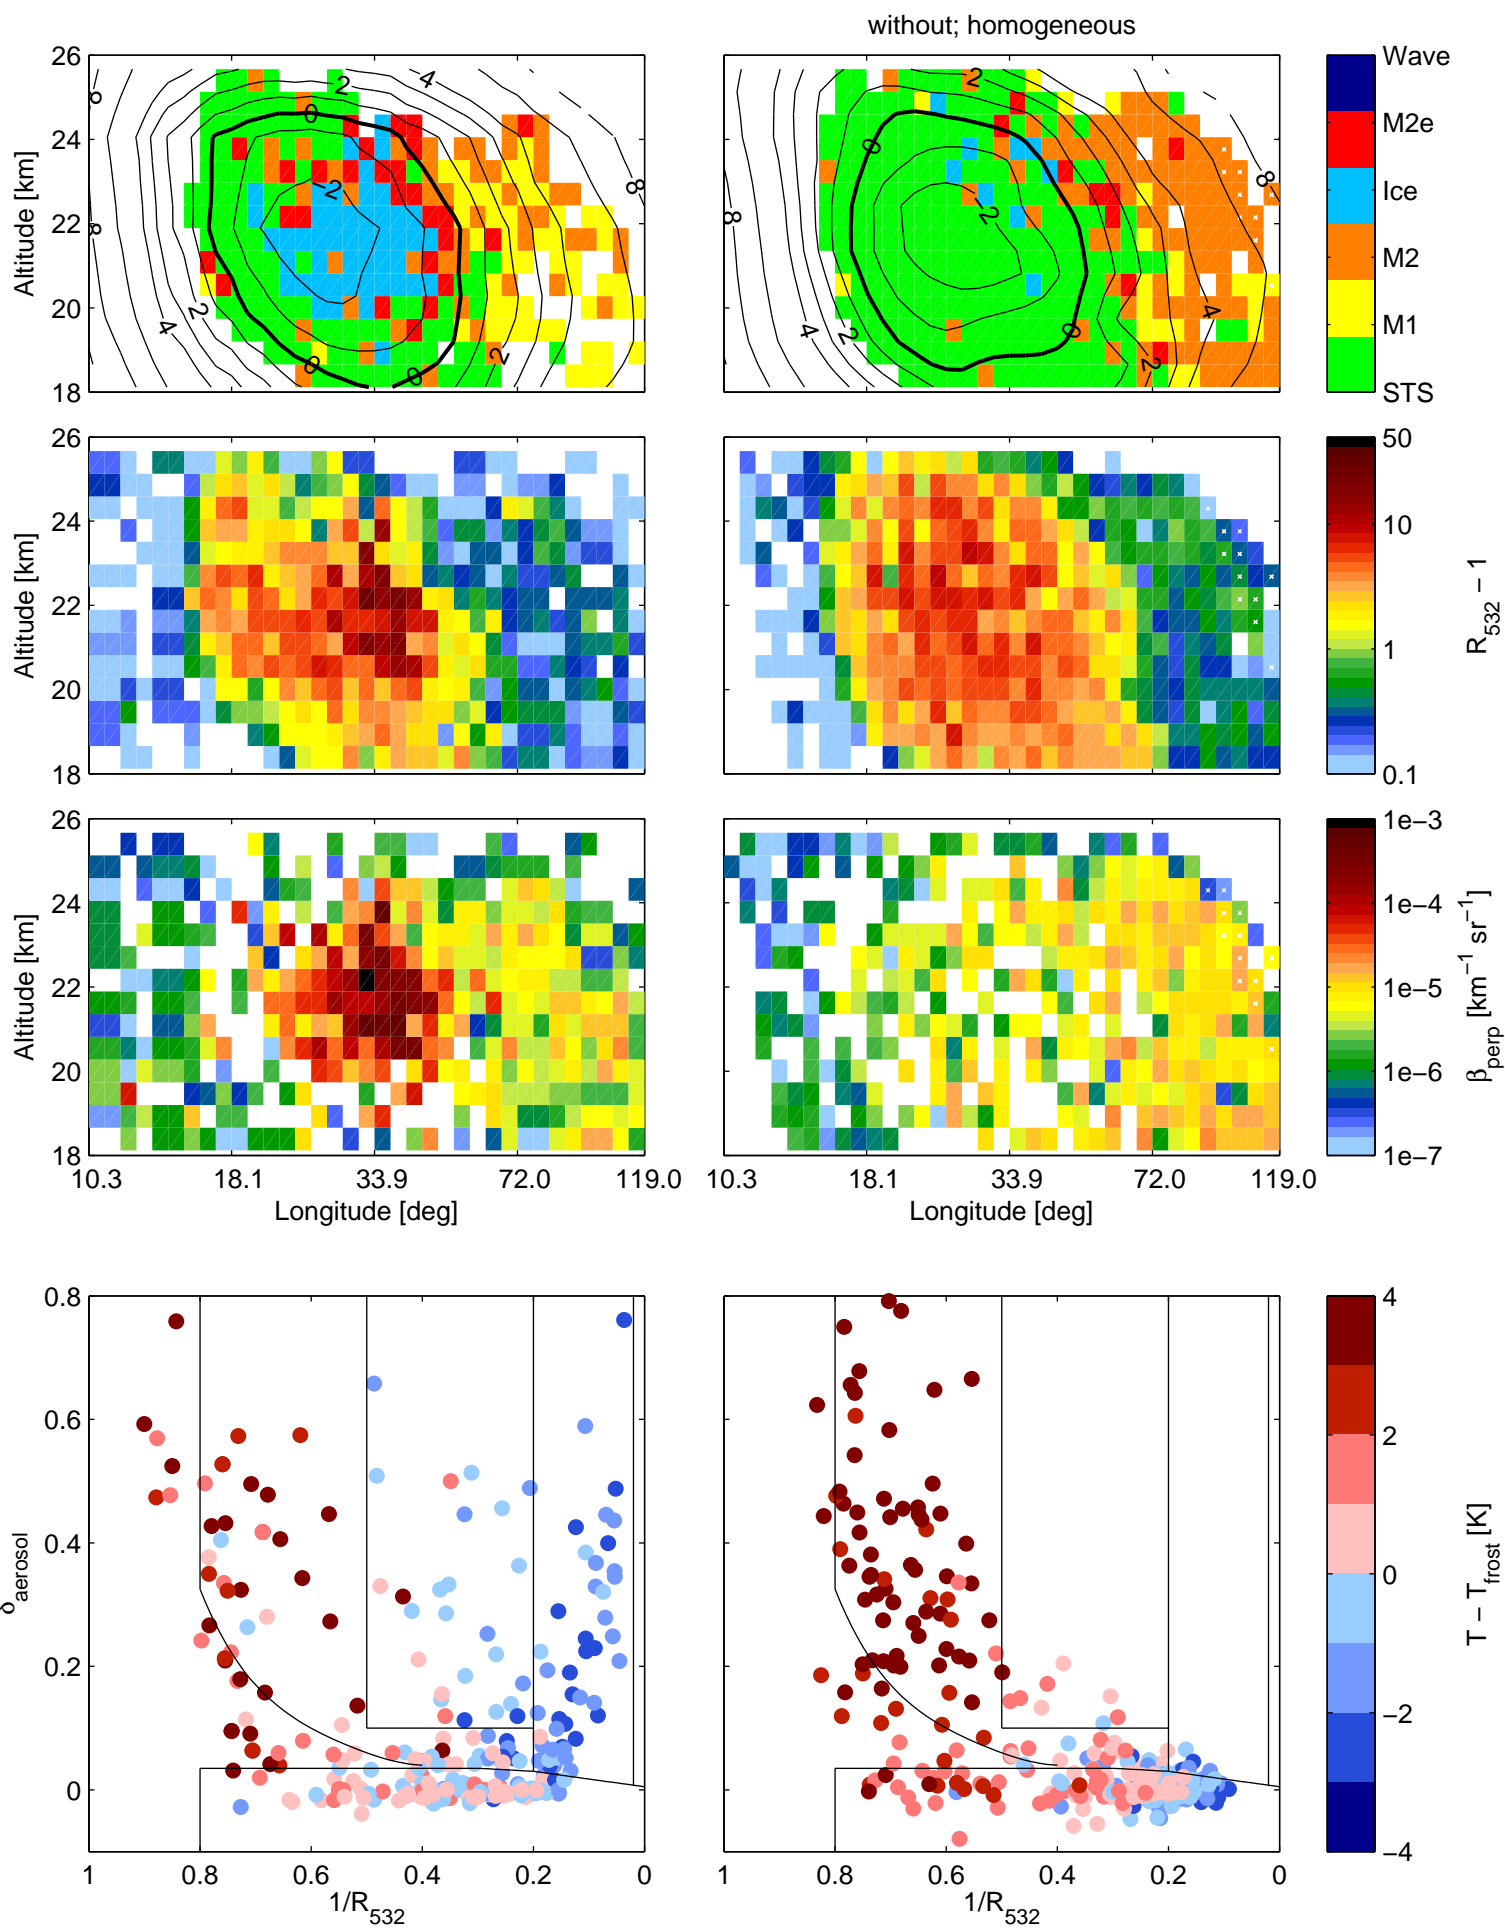

Supplement: Supplementary file 60 [file acp-13-10769-2013-supplement.zip]

CALIPSO observation

Model result

with; homogeneous

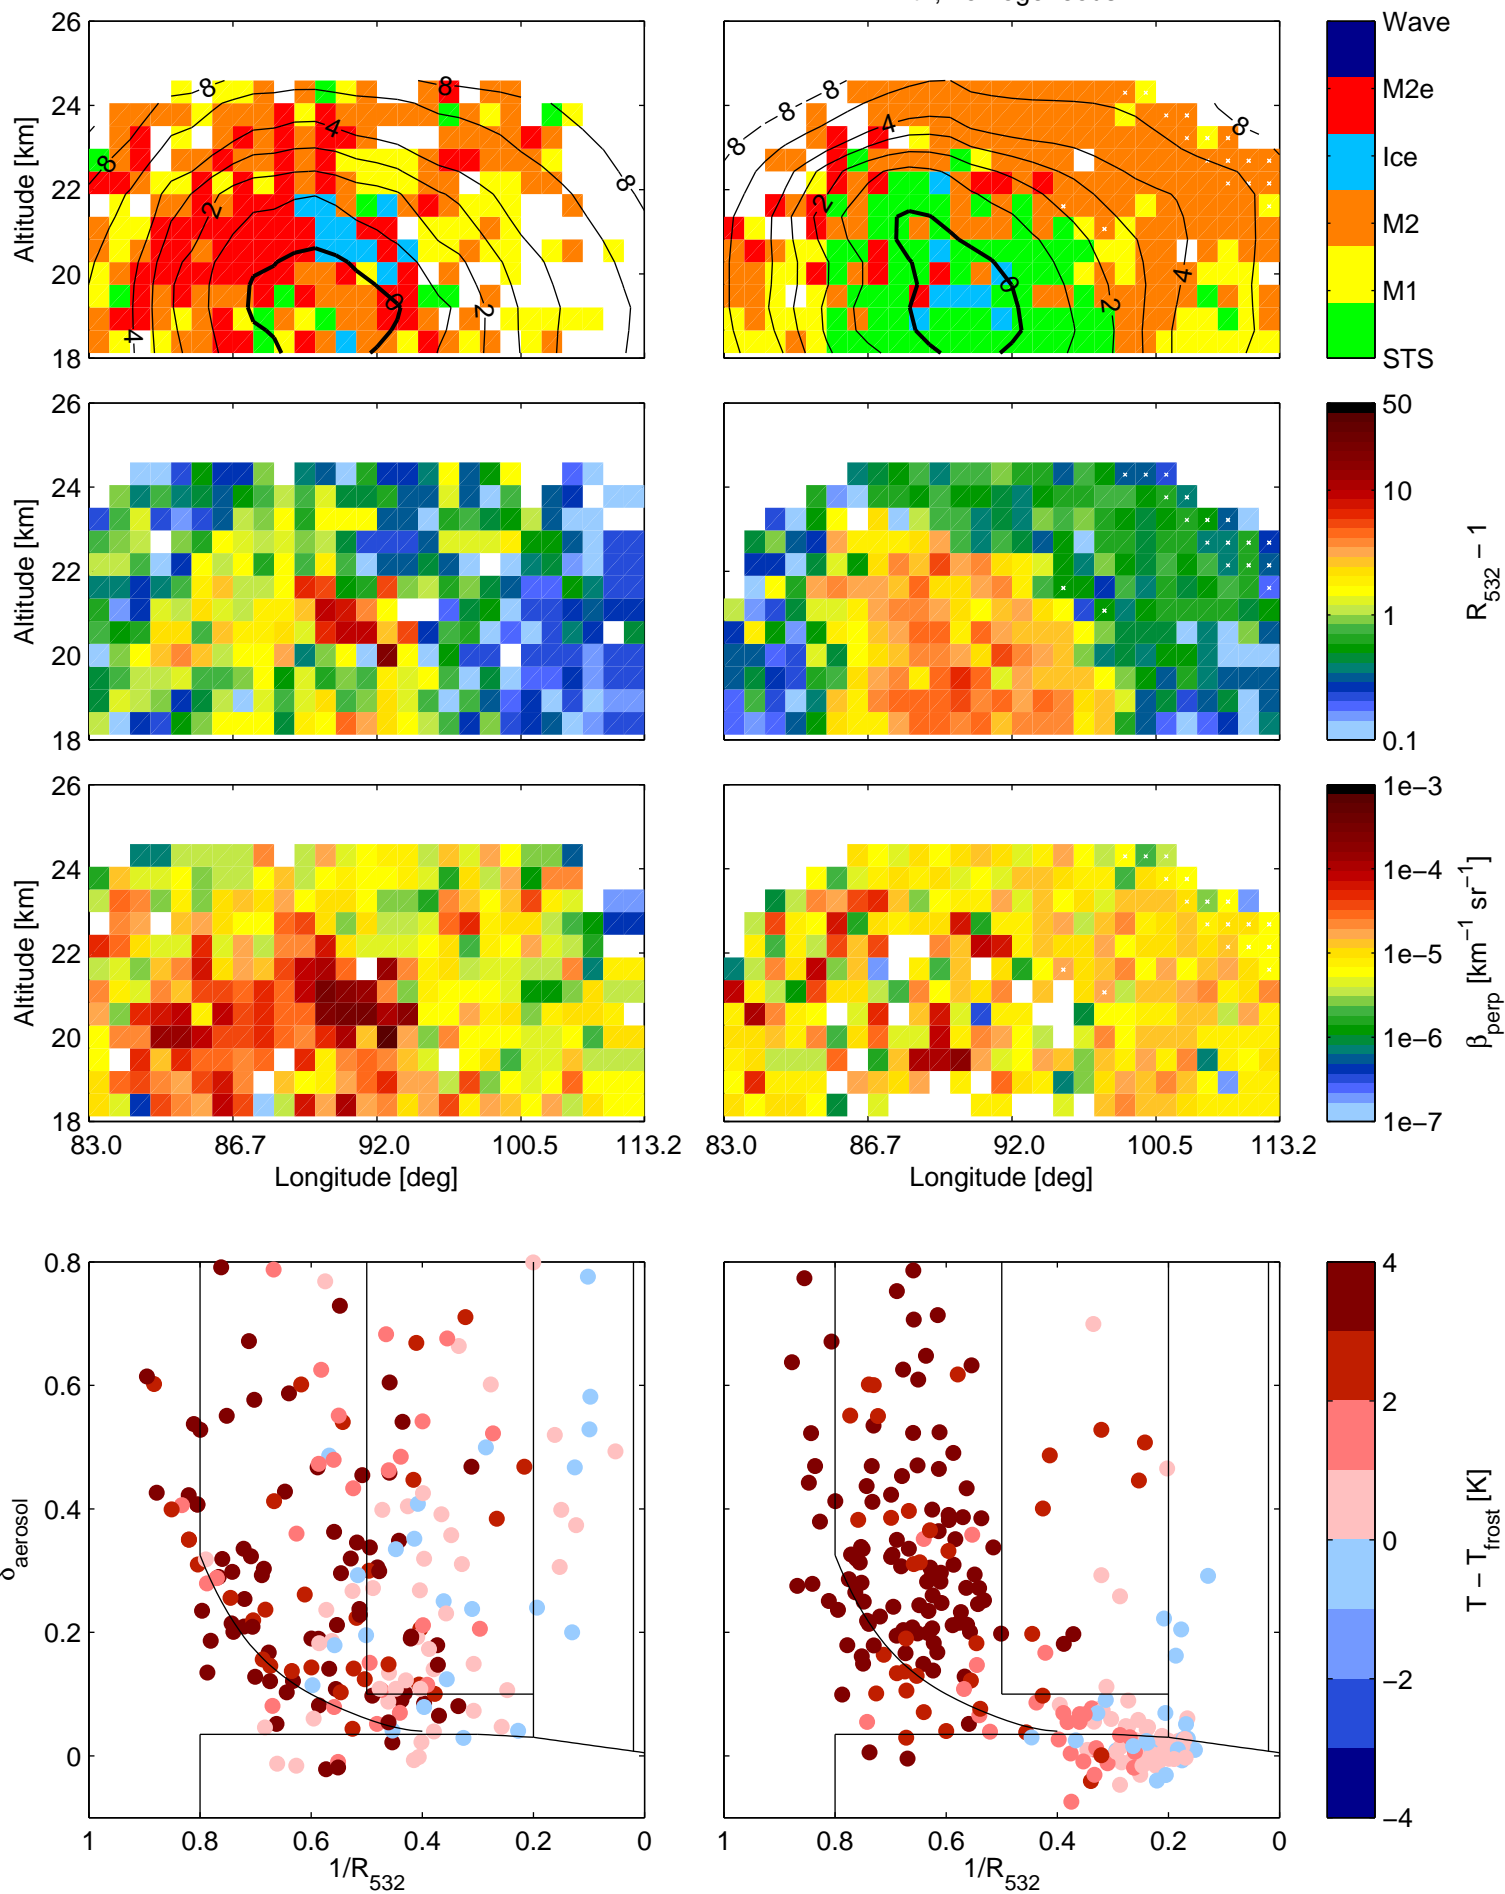

Supplement: Supplementary file 73 [file acp-13-10769-2013-supplement.zip]

CALIPSO observation

Model result

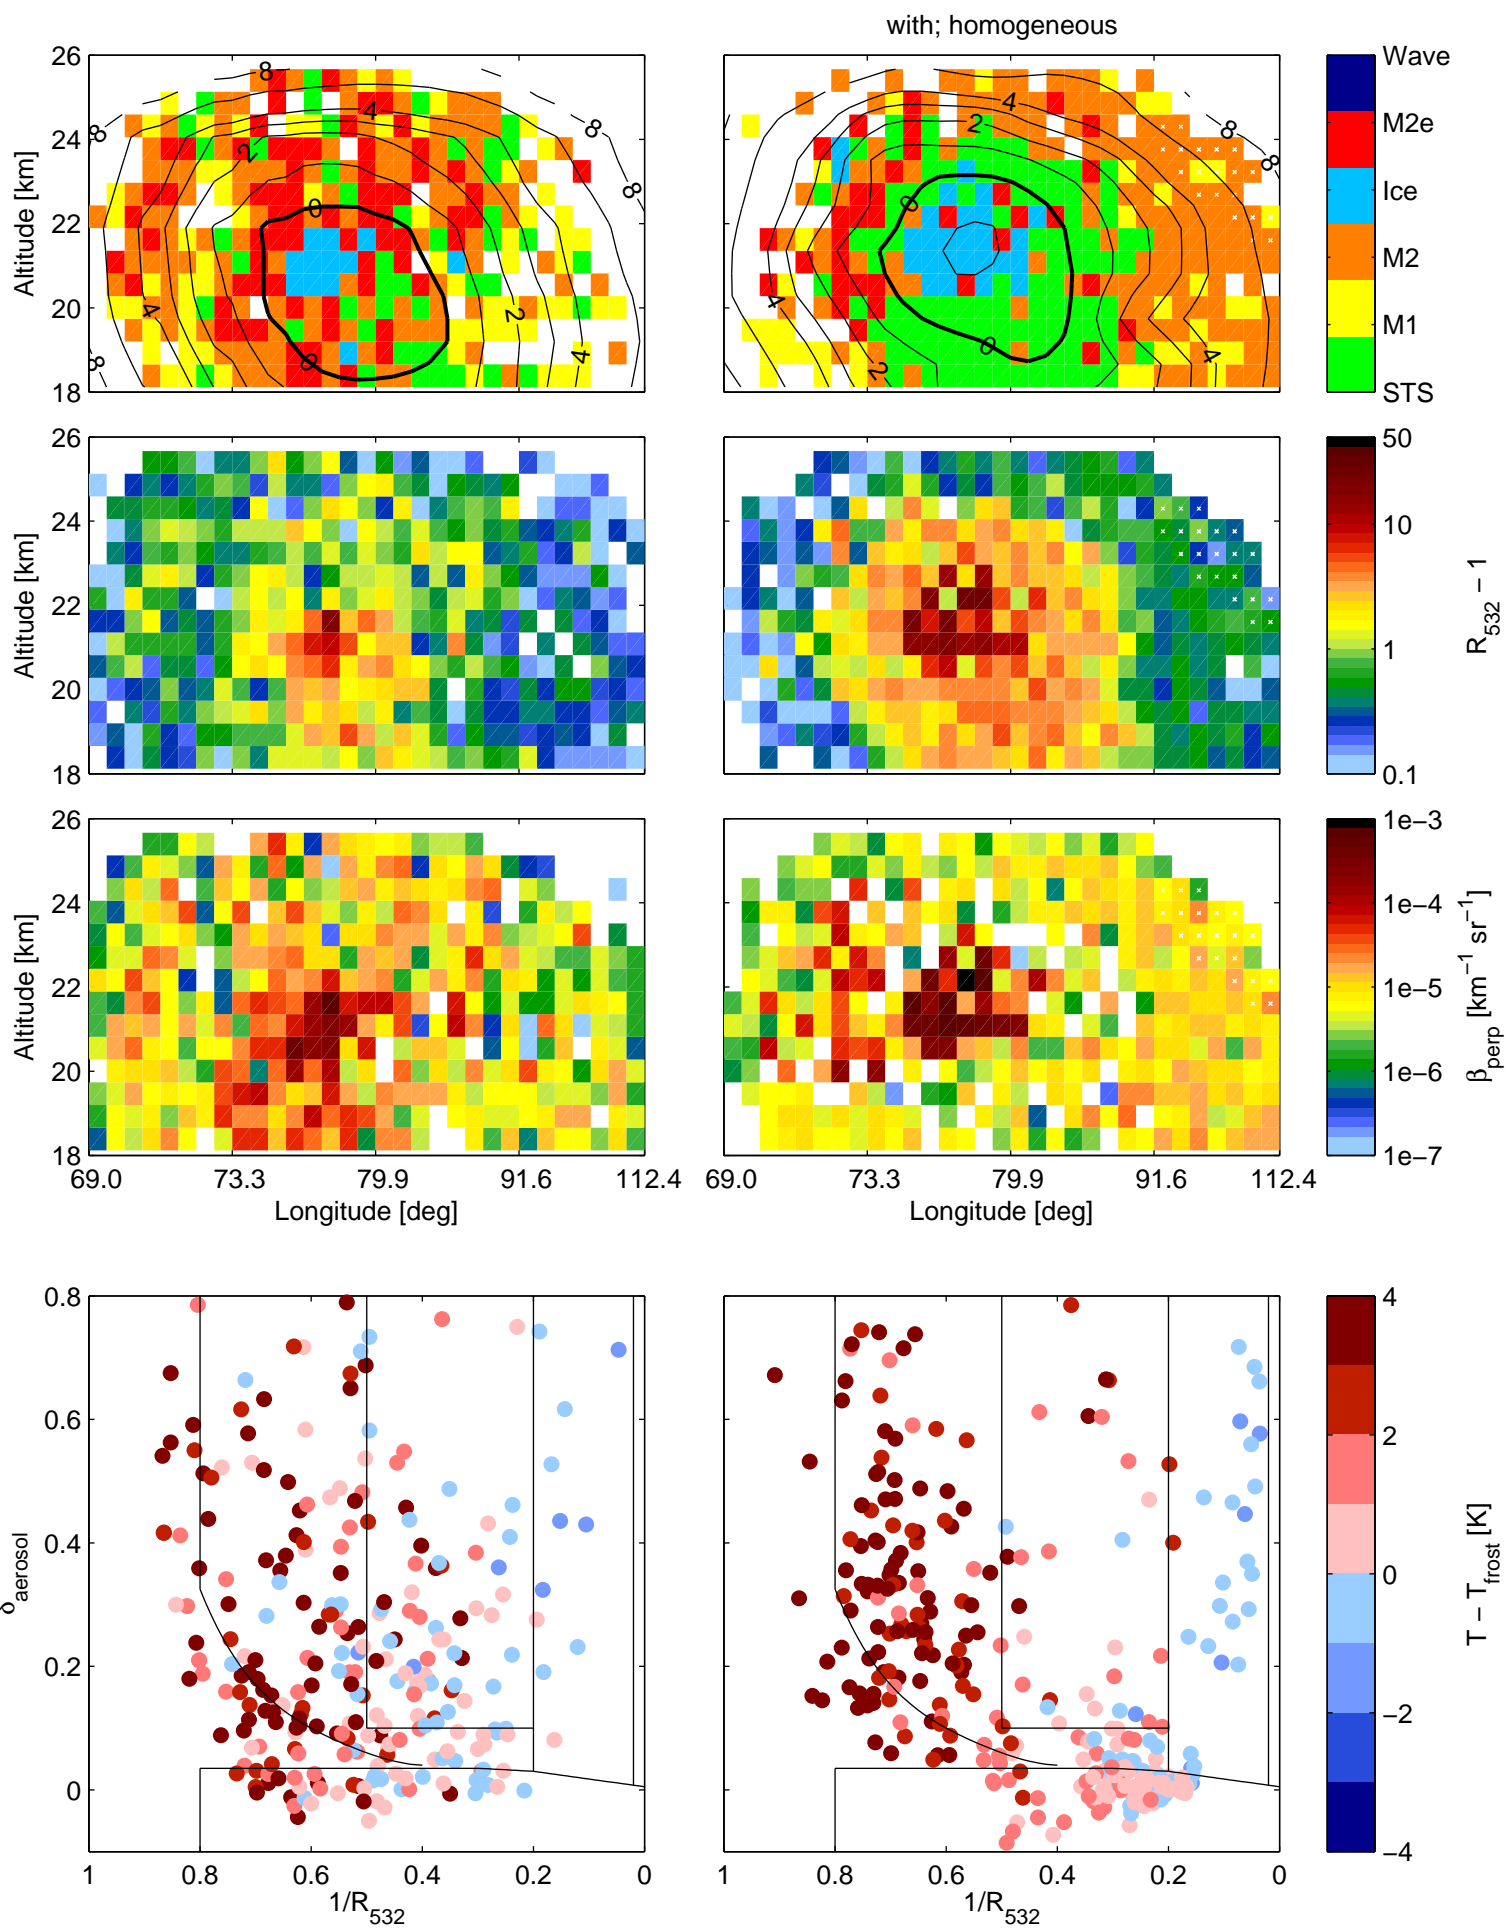

Supplement: Supplementary file 91 [file acp-13-10769-2013-supplement.zip]

CALIPSO observation

Model result

with; homogeneous

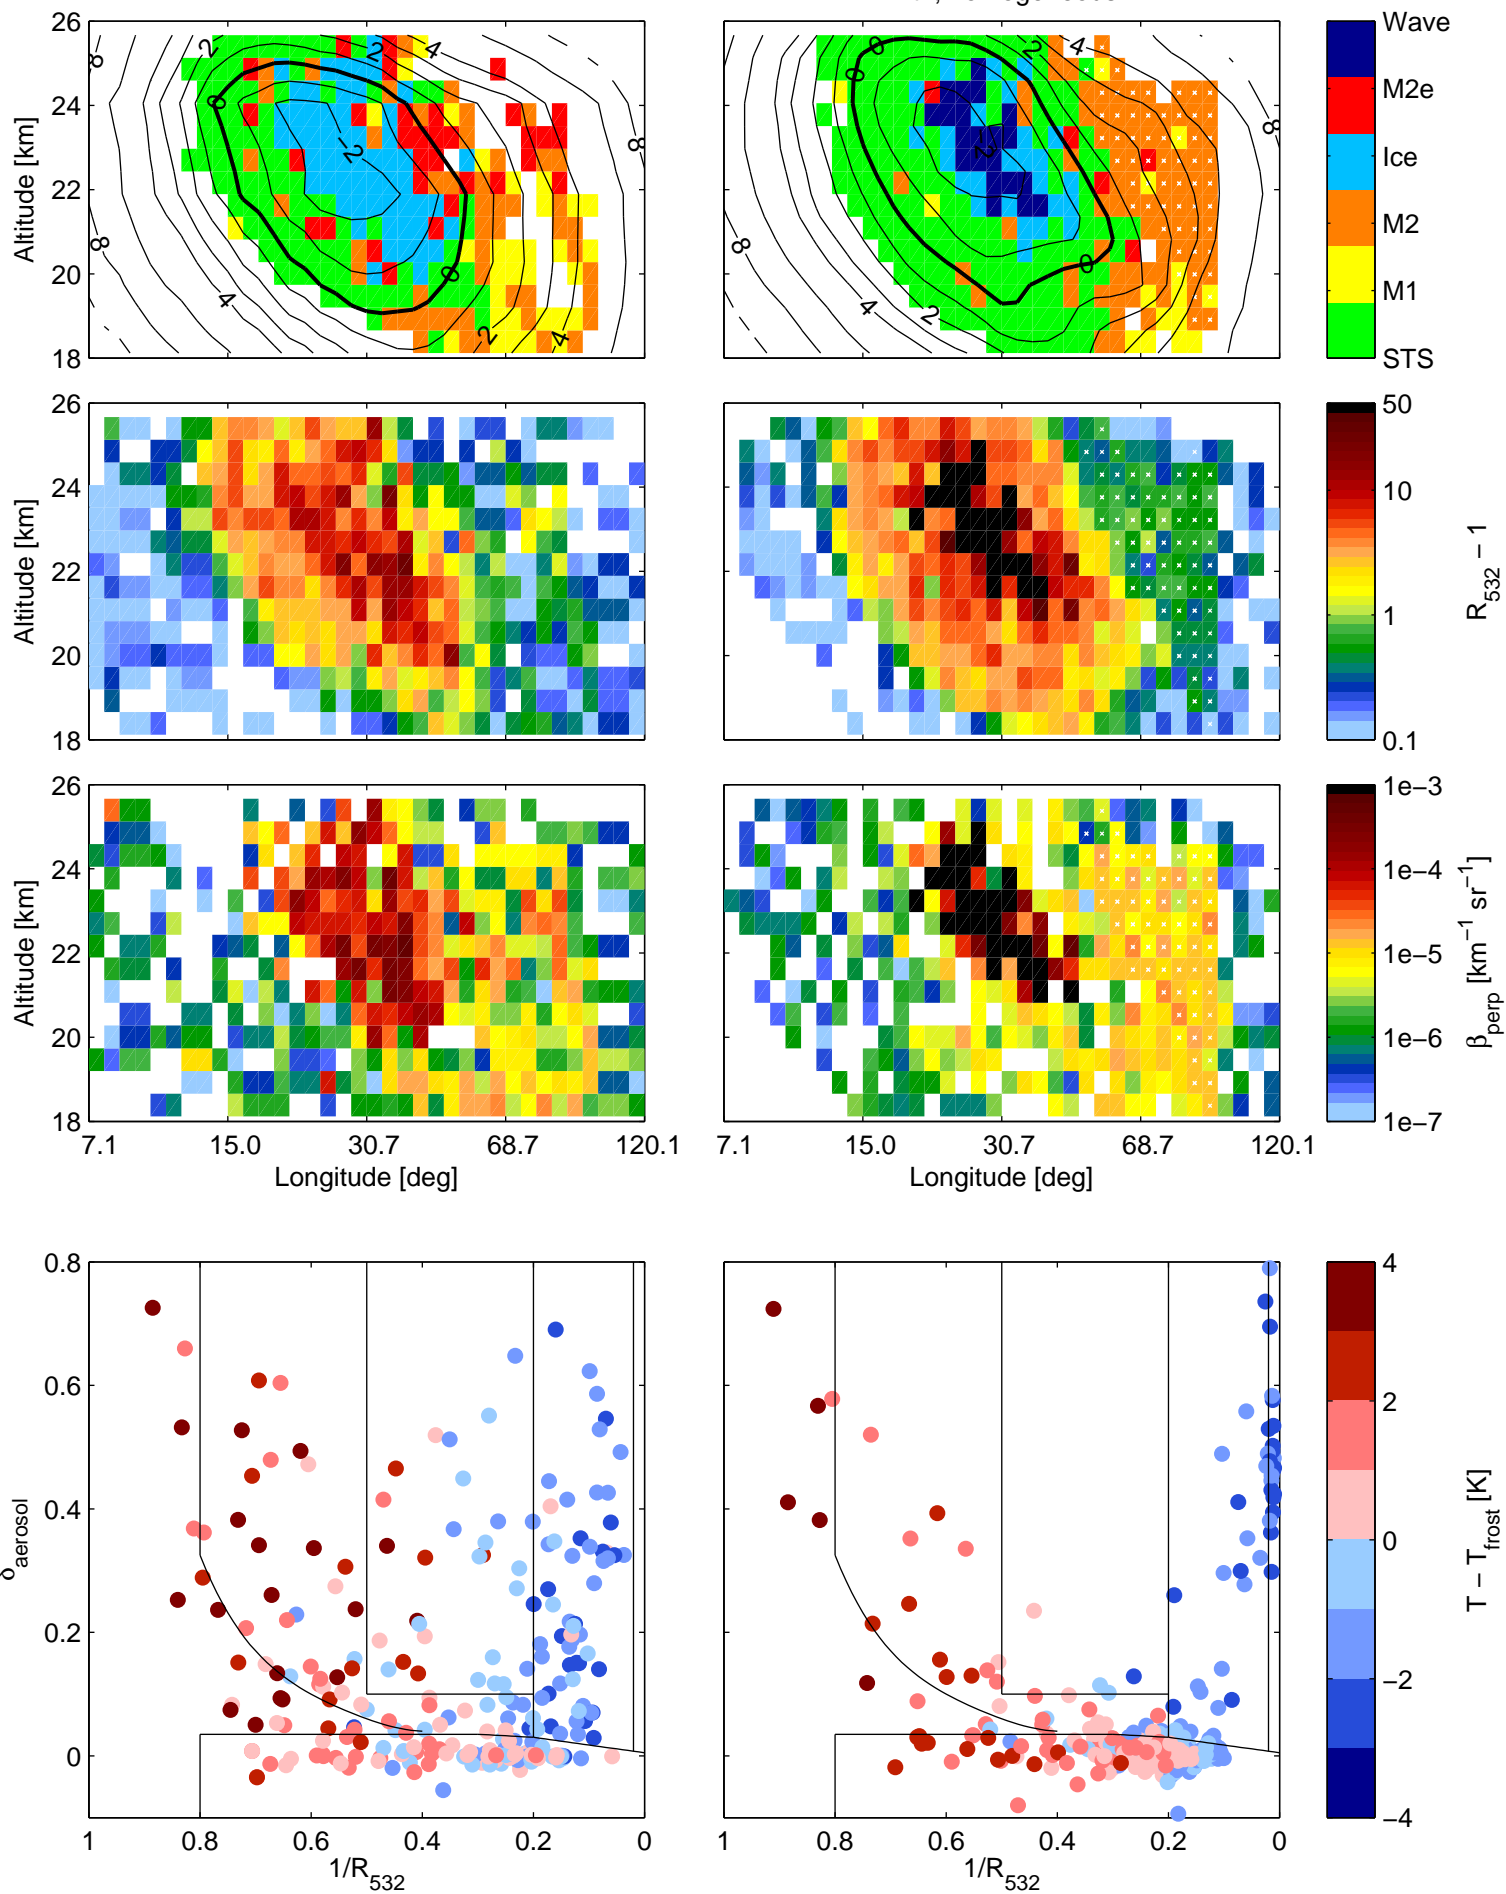

Supplement: Supplementary file 95 [file acp-13-10769-2013-supplement.zip]

CALIPSO observation

Model result

with; homogeneous

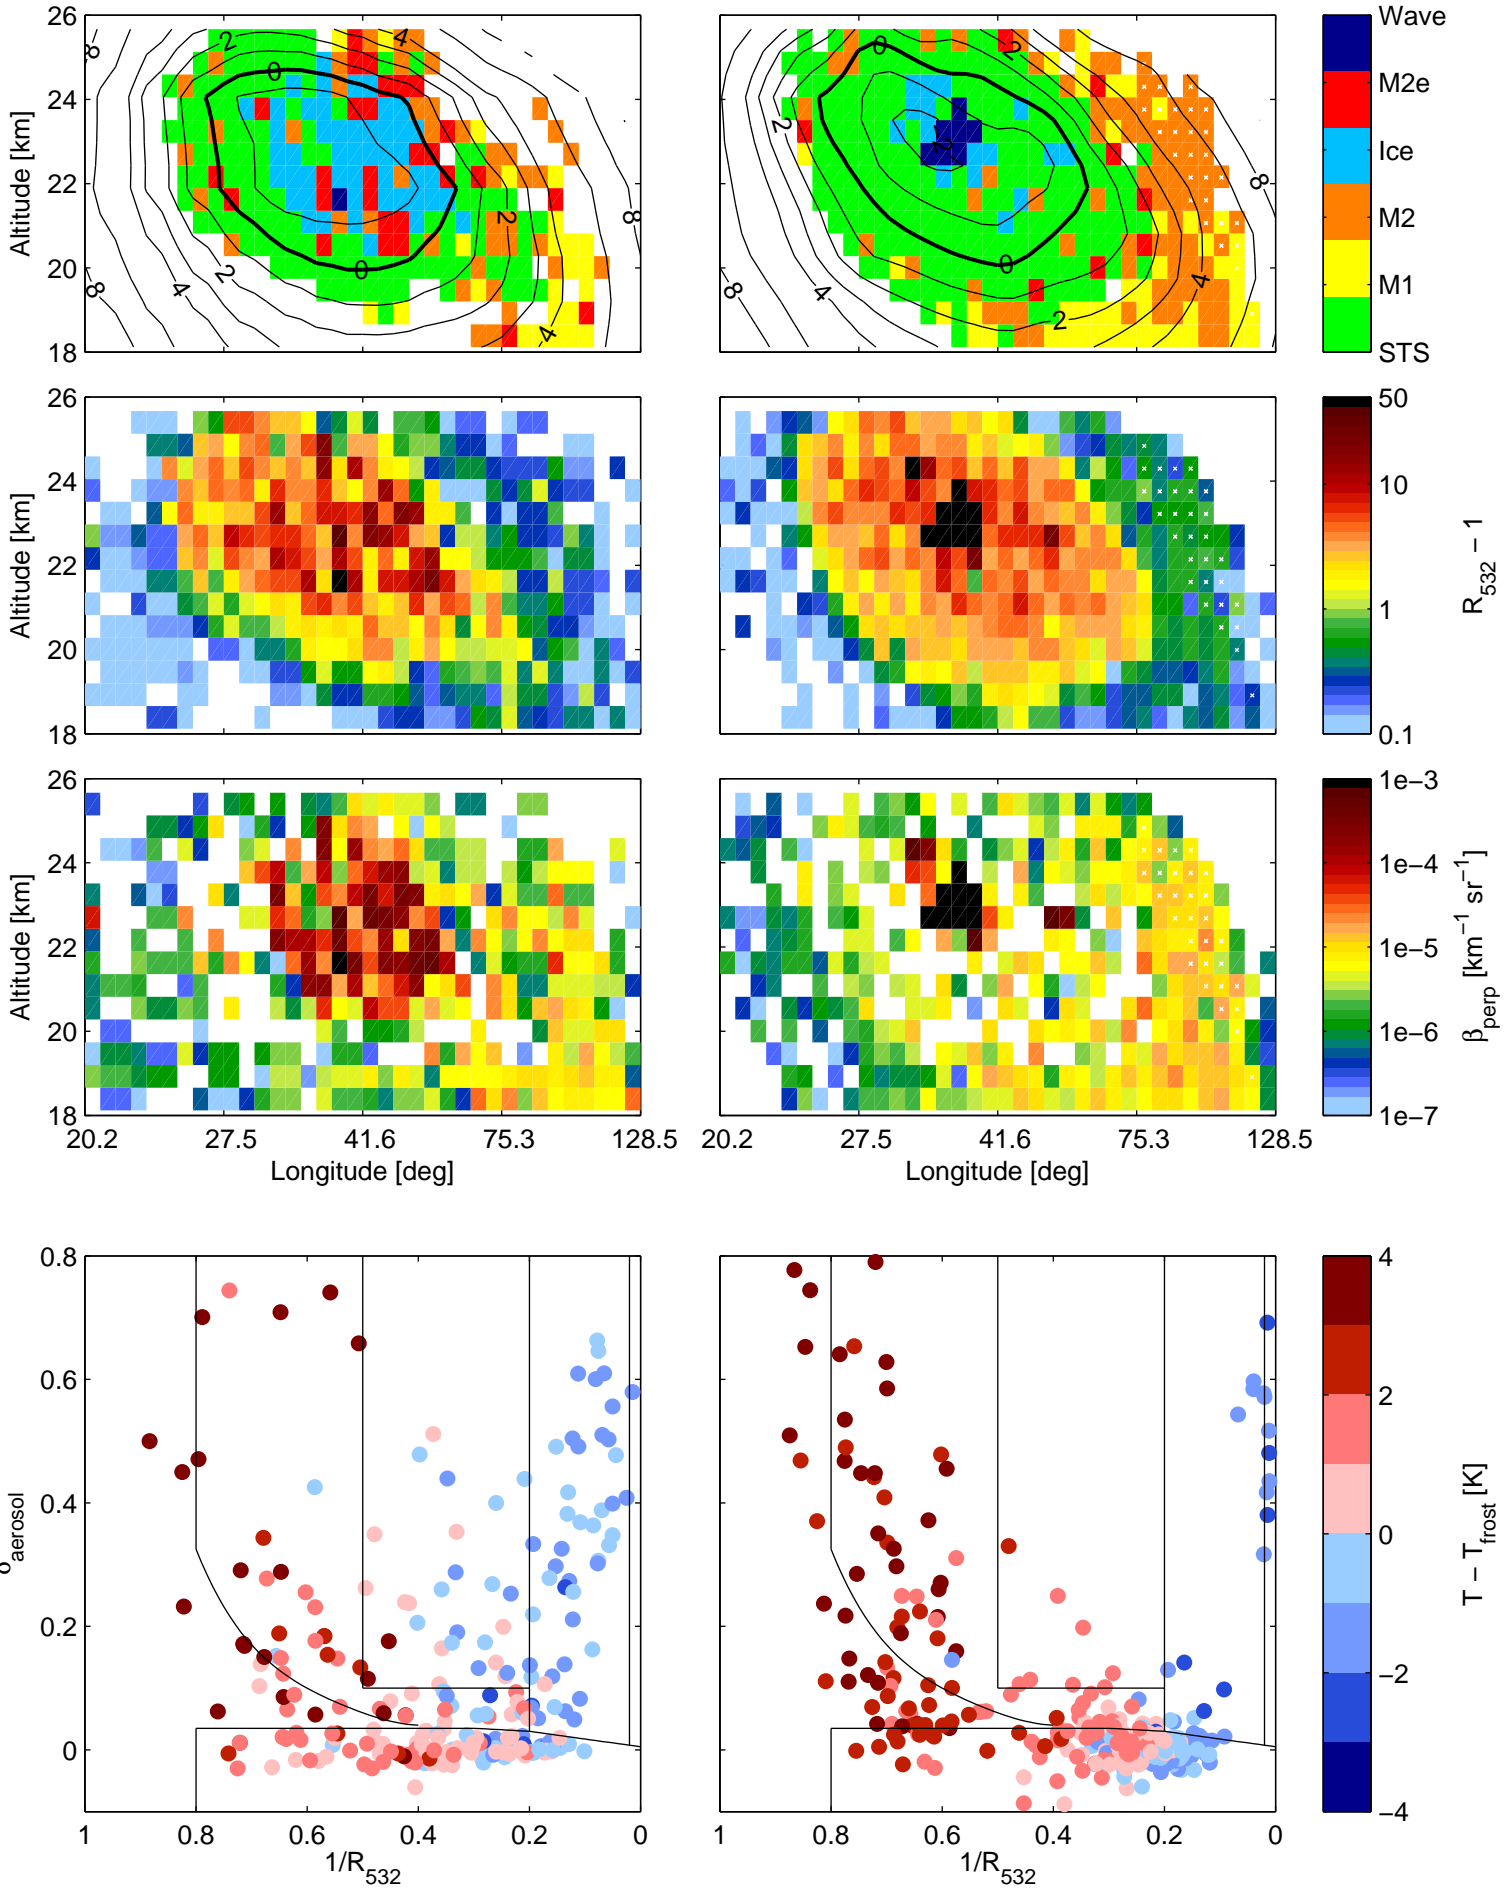

Supplement: Supplementary file 108 [file acp-13-10769-2013-supplement.zip]

CALIPSO observation

Model result

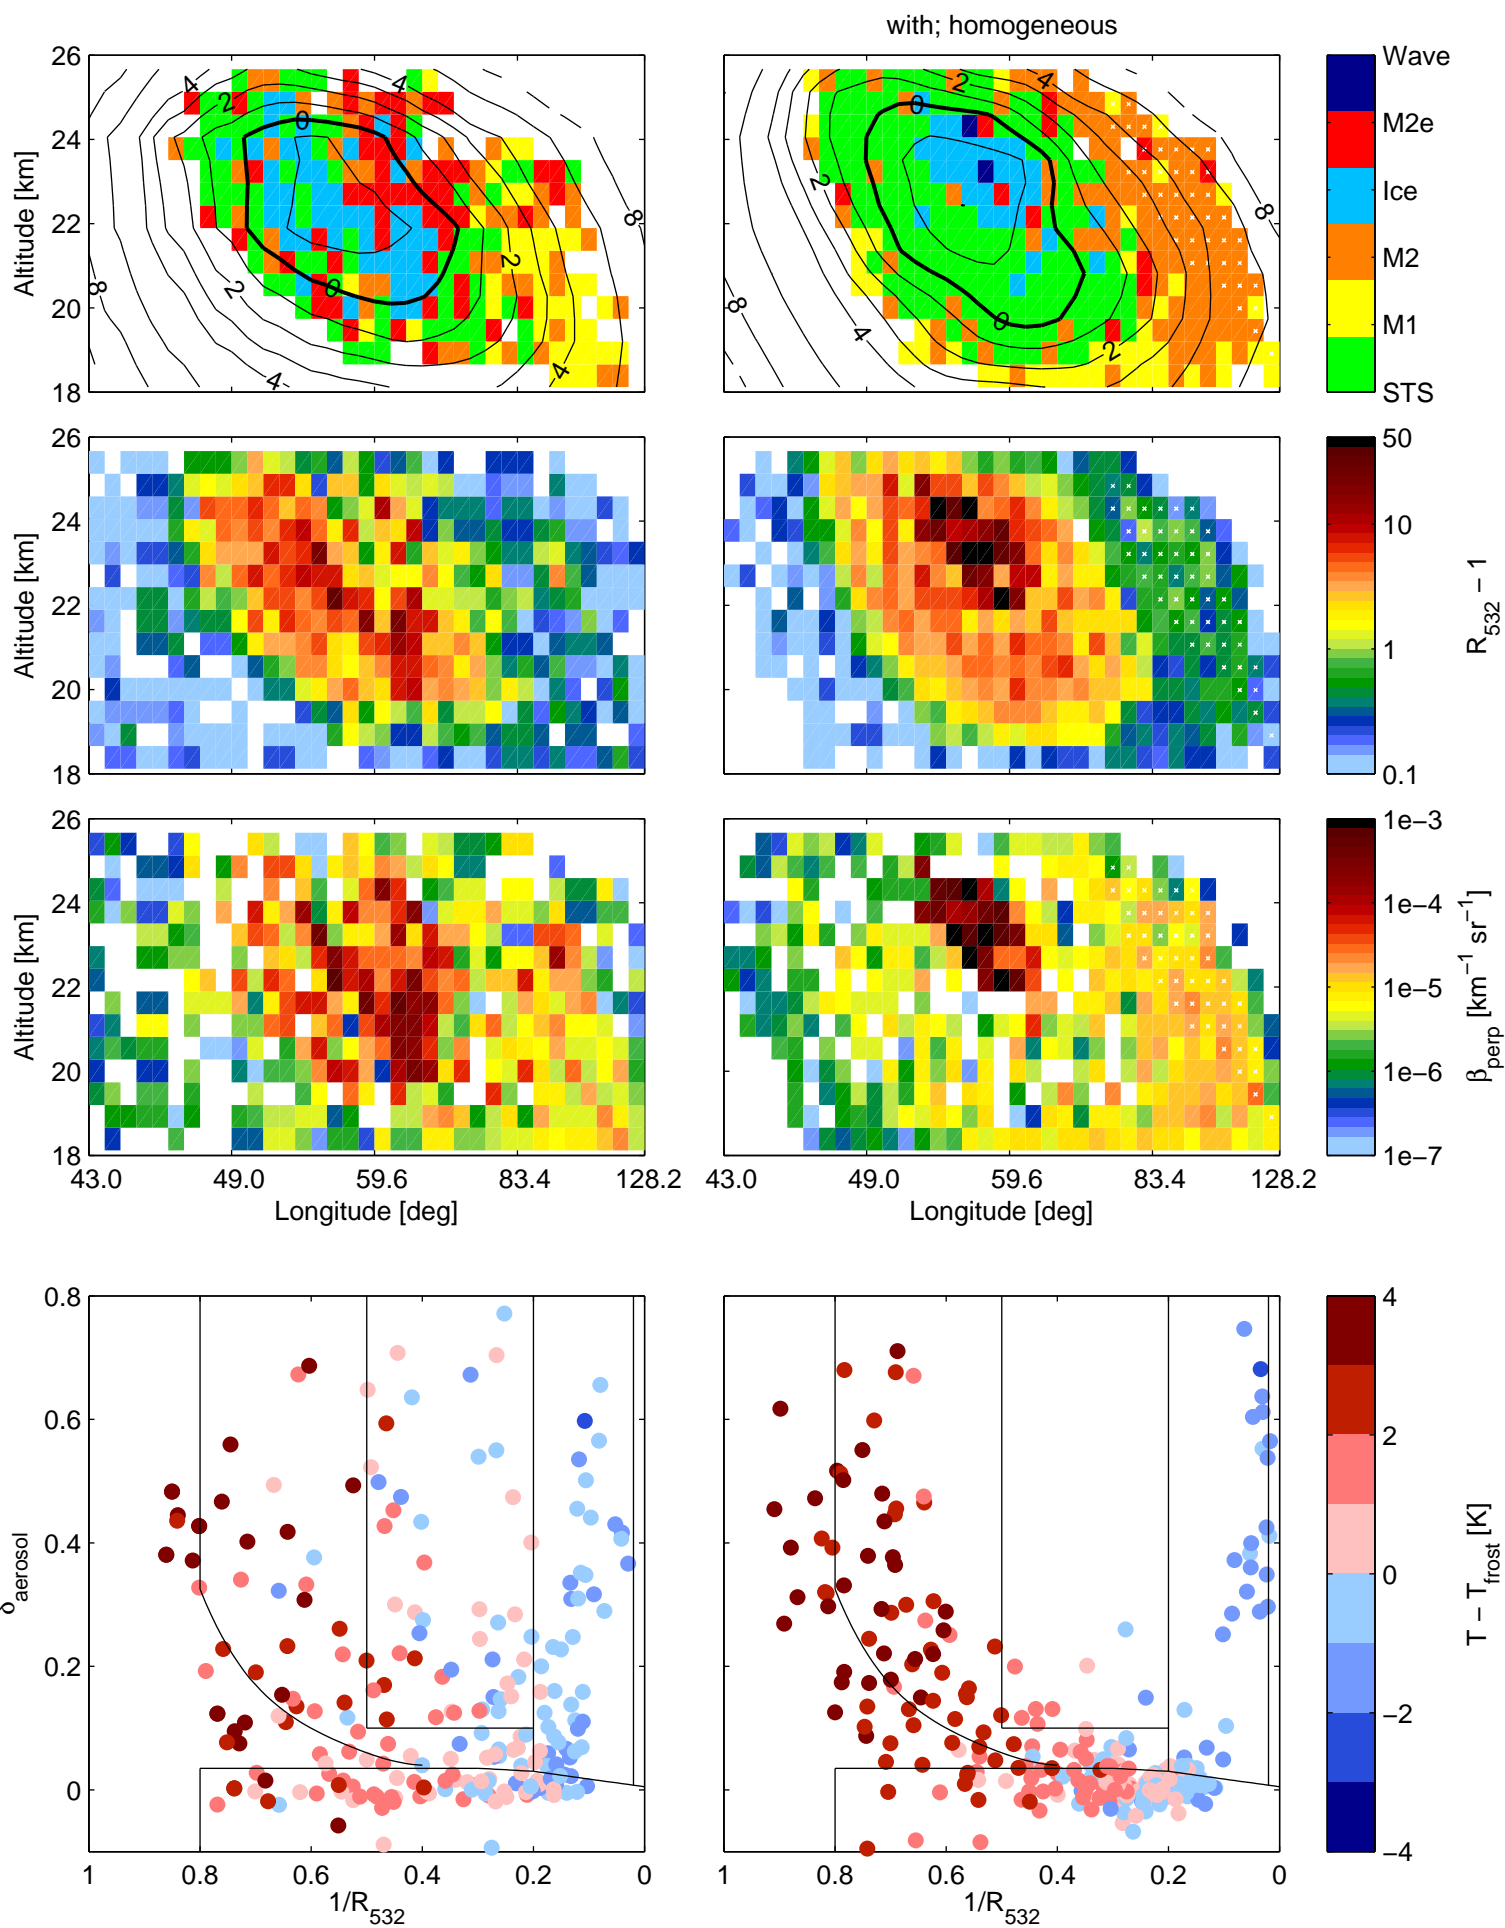

Supplement: Supplementary file 113 [file acp-13-10769-2013-supplement.zip]

CALIPSO observation

Model result

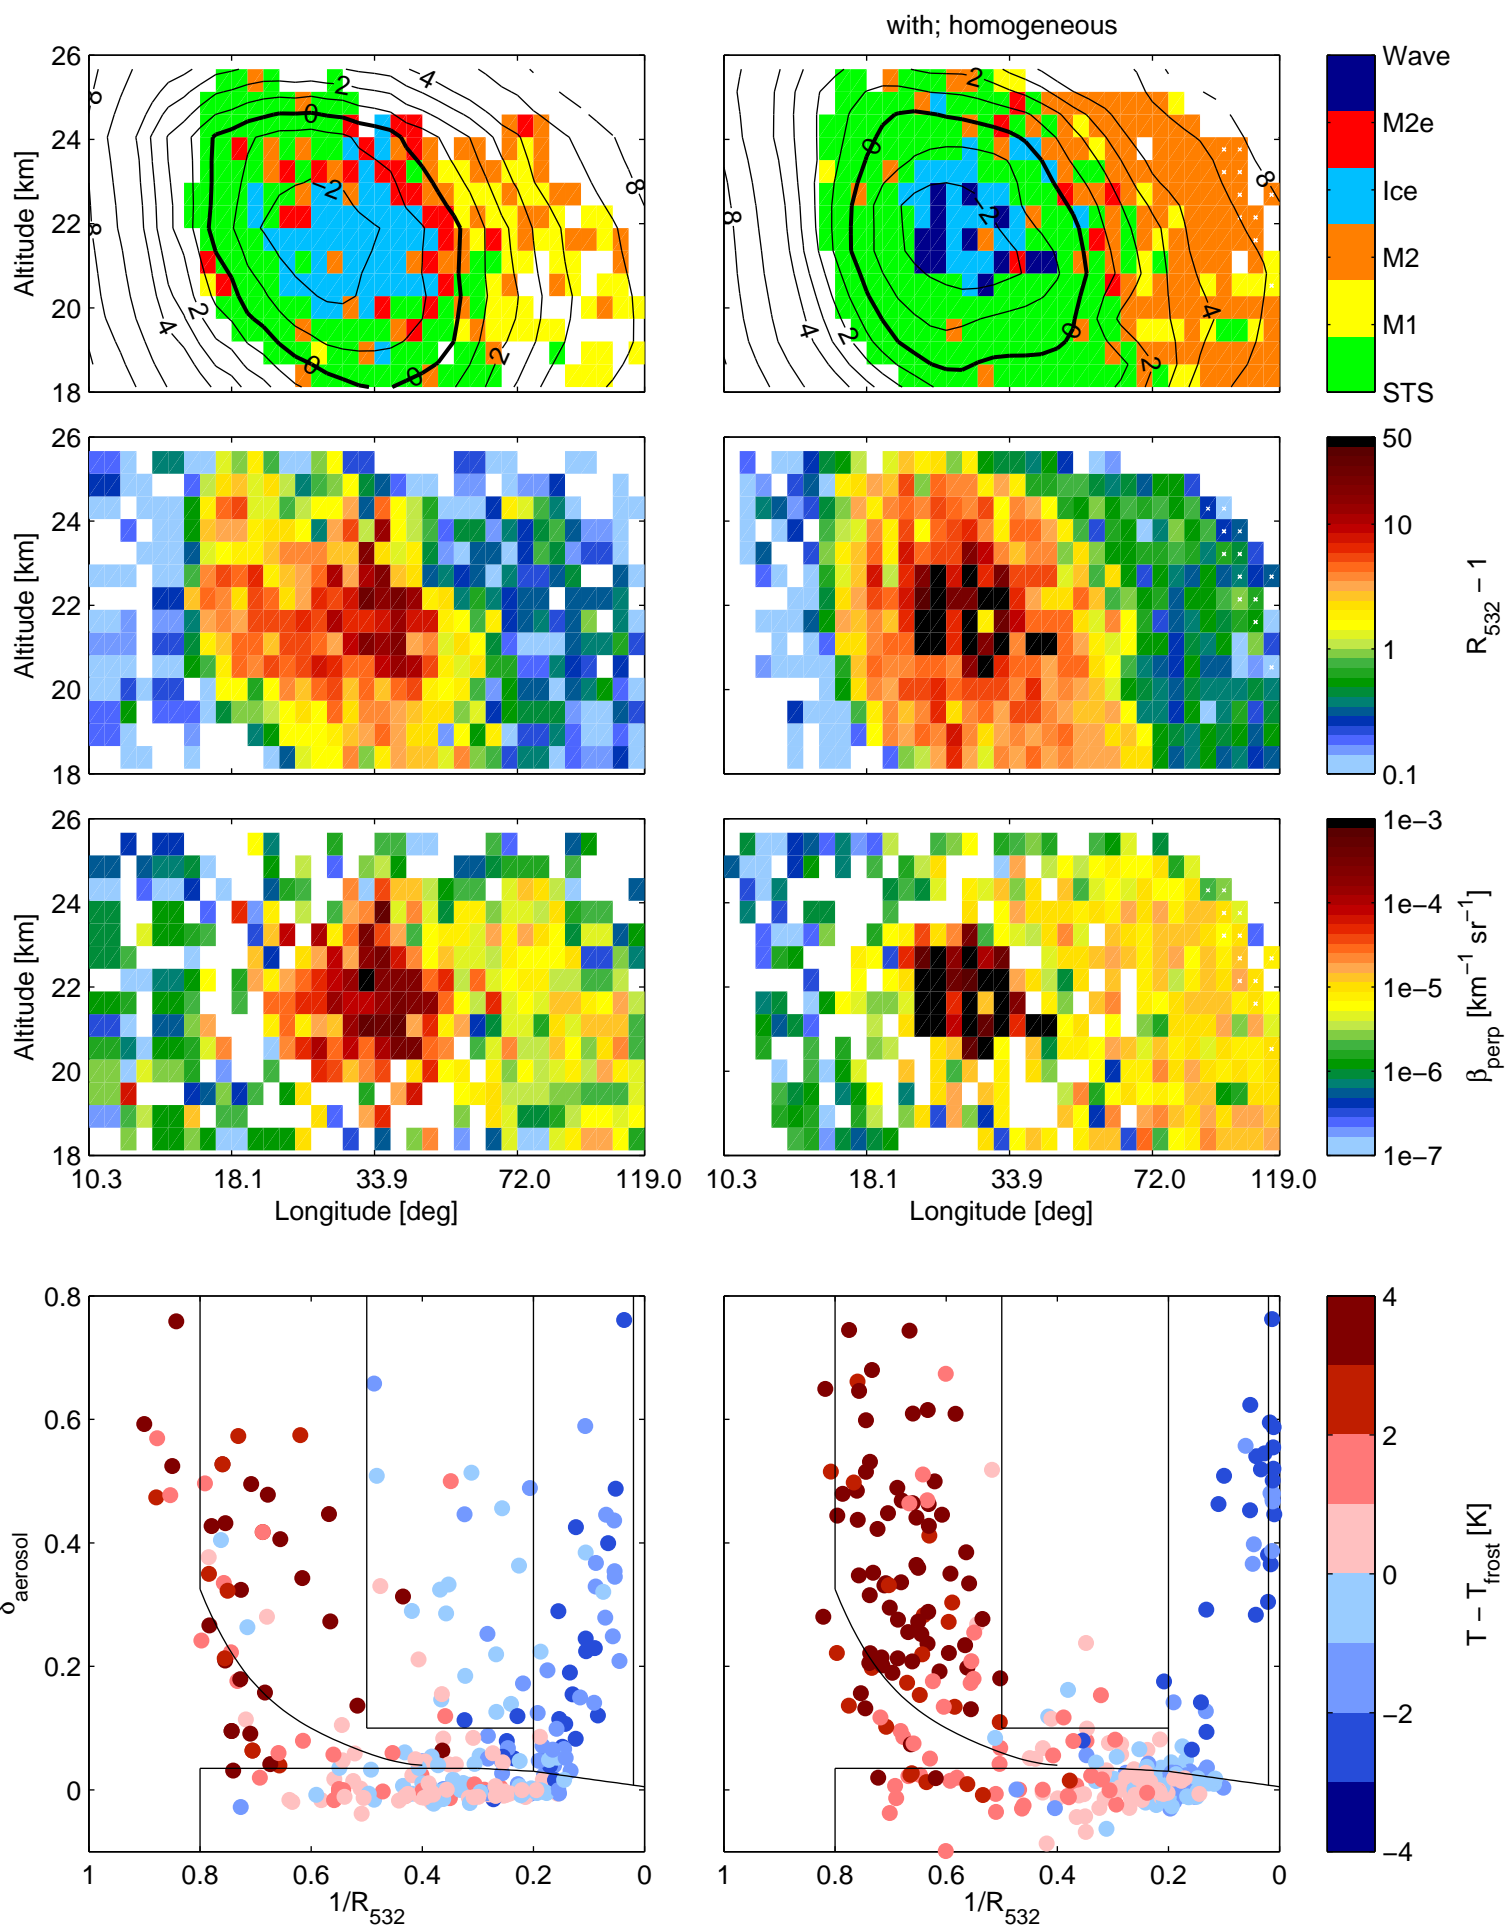

Supplement: Supplementary file 119 [file acp-13-10769-2013-supplement.zip]

CALIPSO observation

Model result

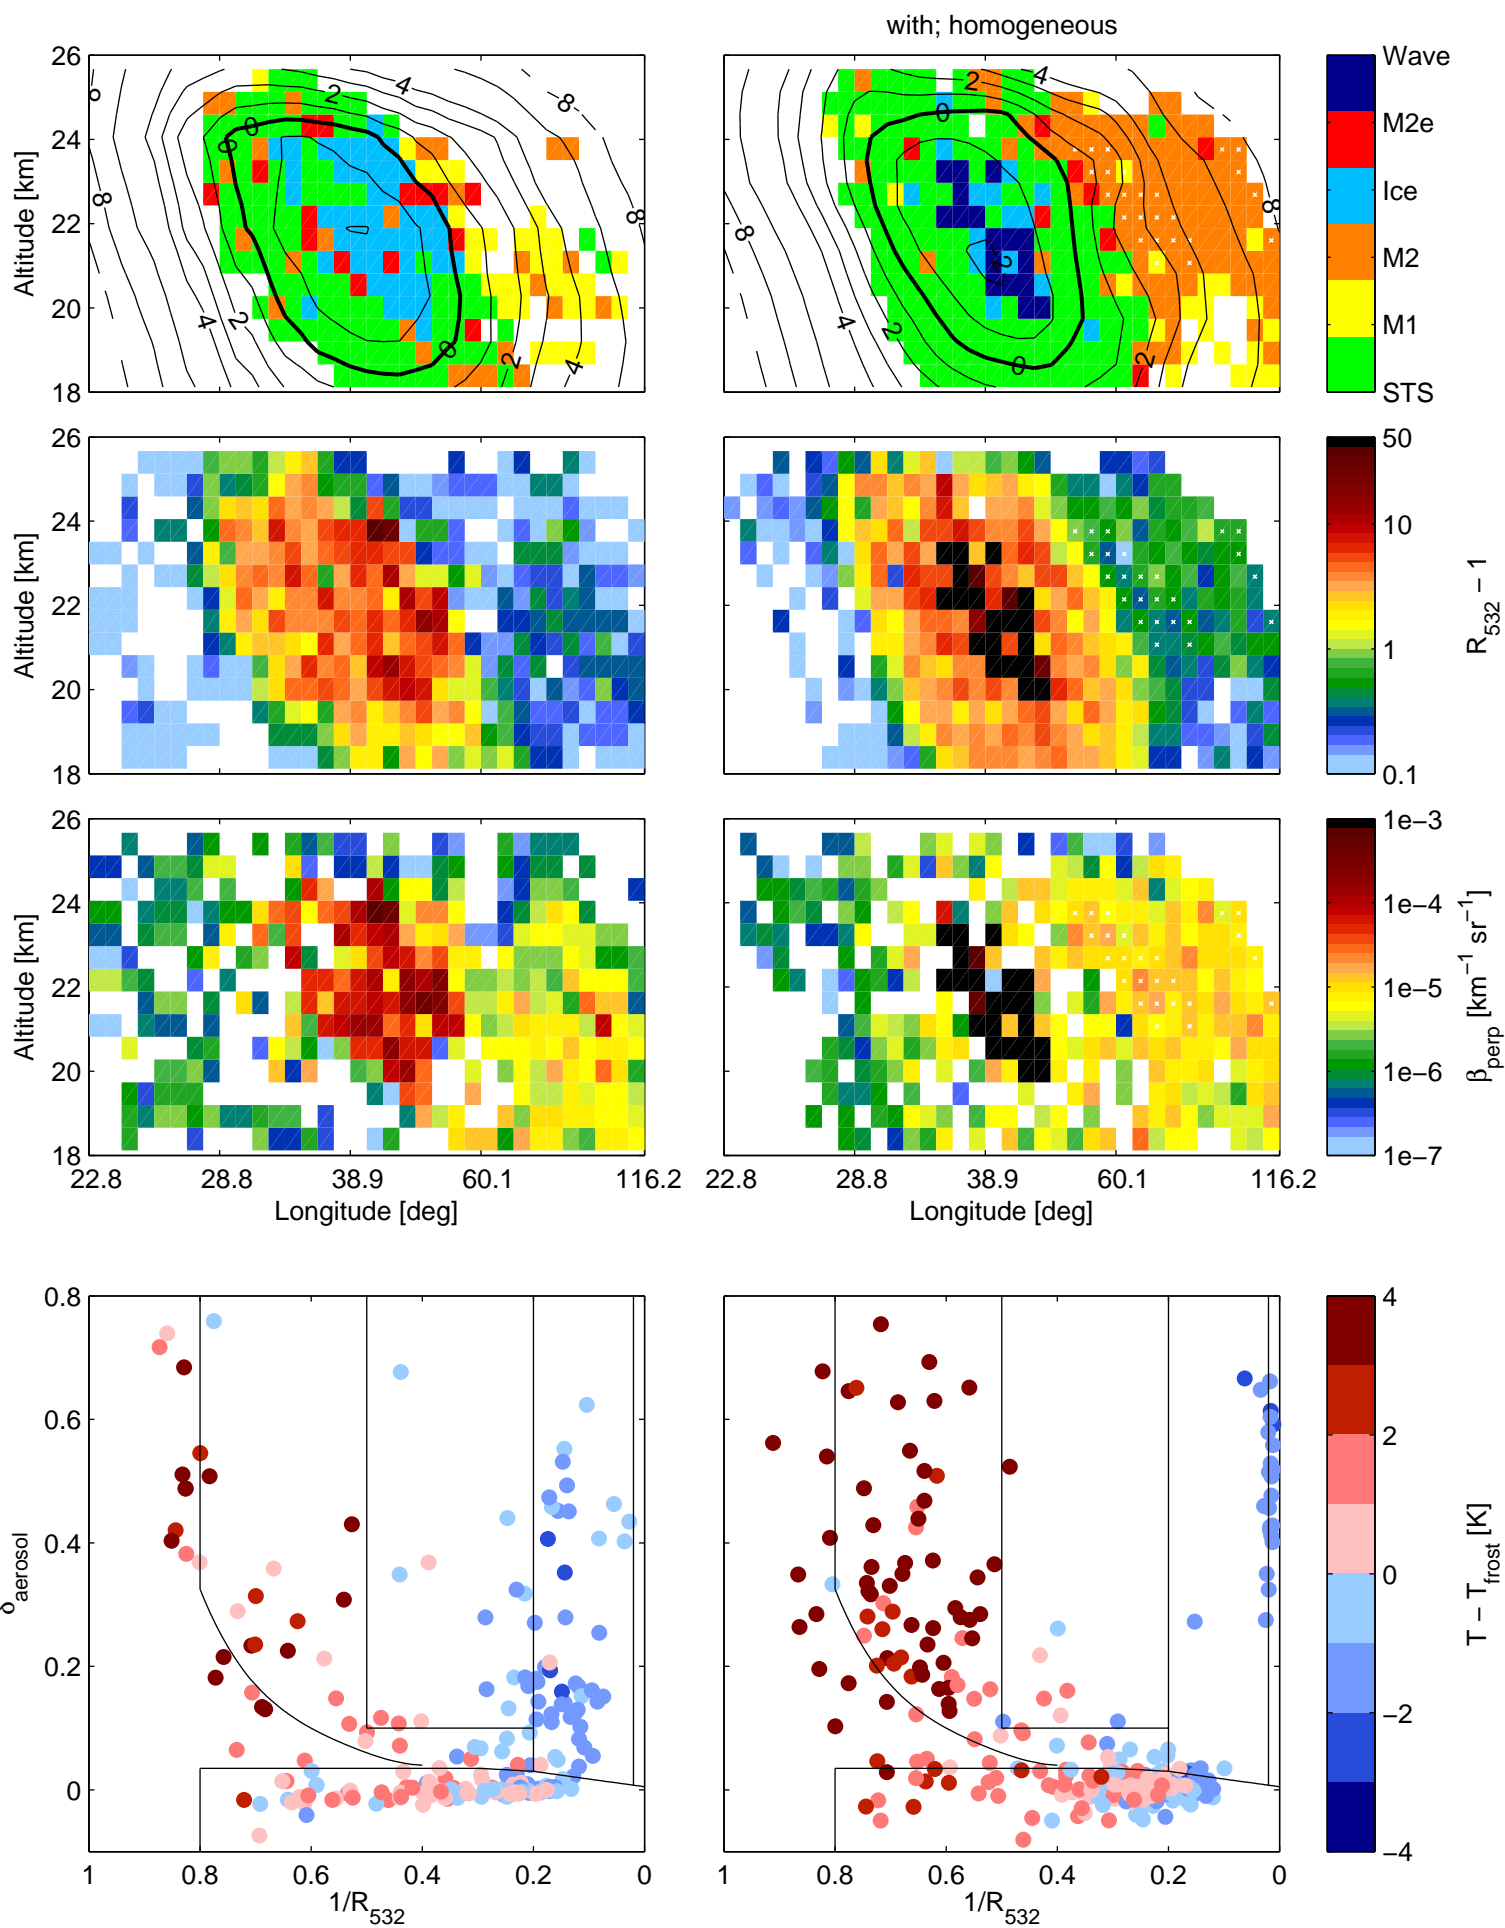

Supplement: Supplementary file 130 [file acp-13-10769-2013-supplement.zip]

CALIPSO observation

Model result

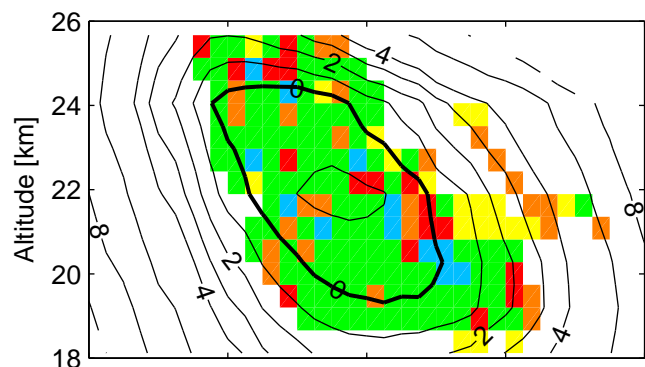

without; homogeneous

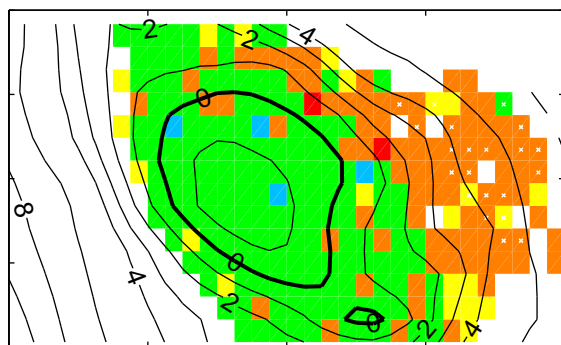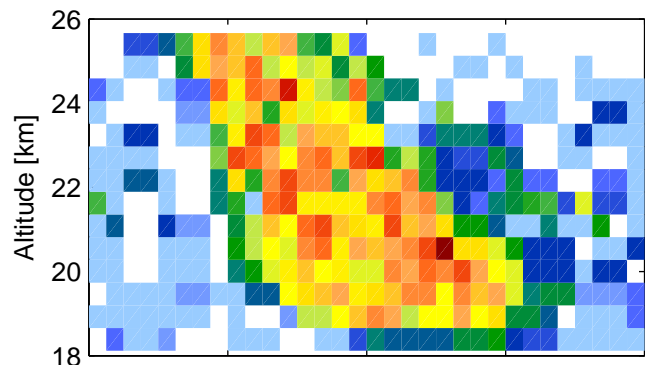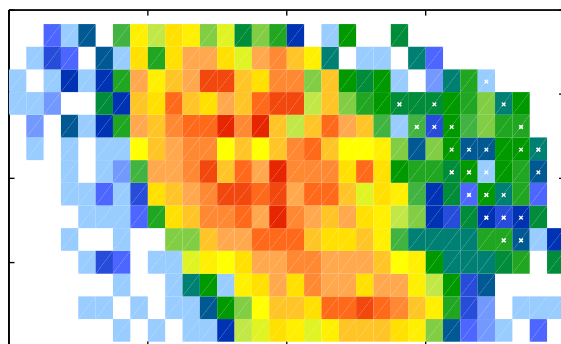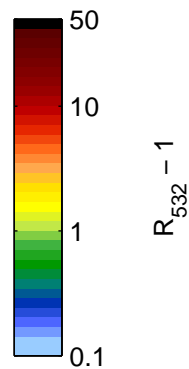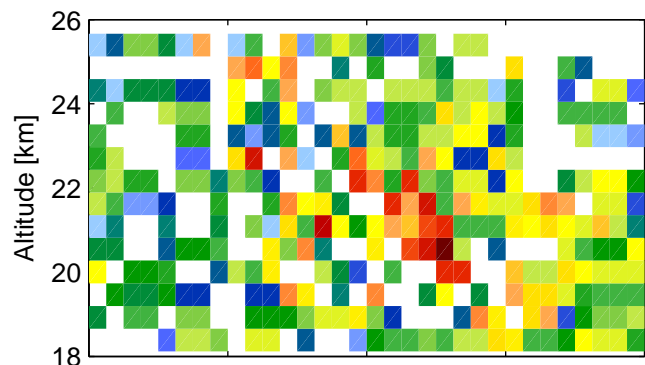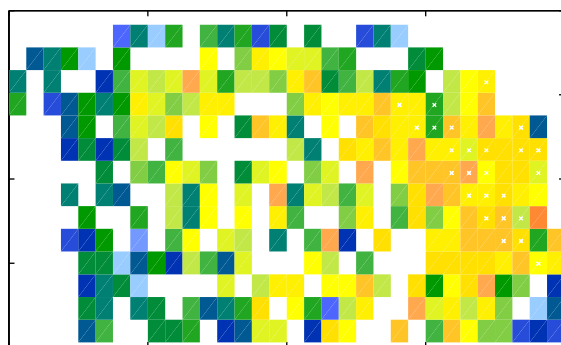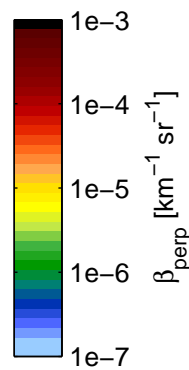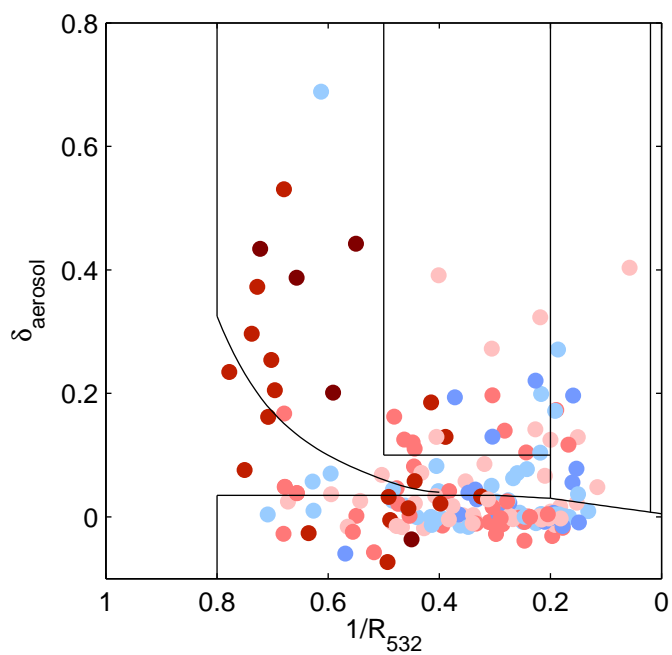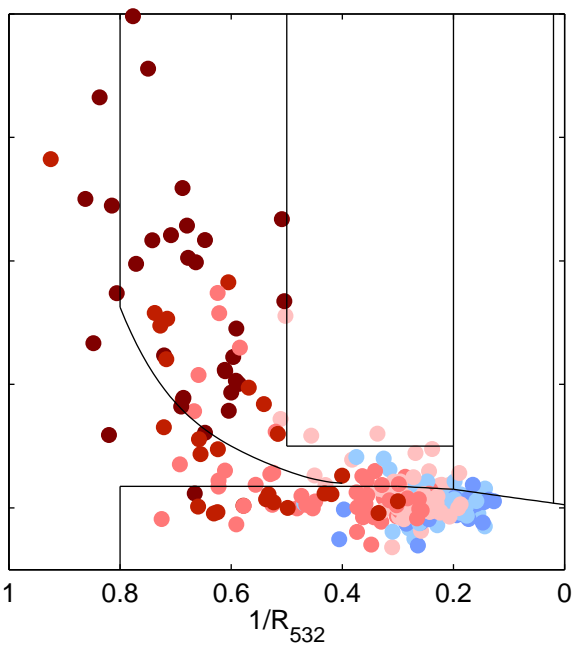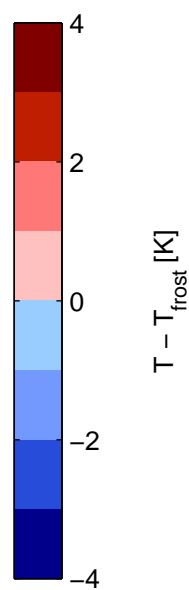

Supplement: Supplementary file 134 [file acp-13-10769-2013-supplement.zip]

CALIPSO observation

Model result

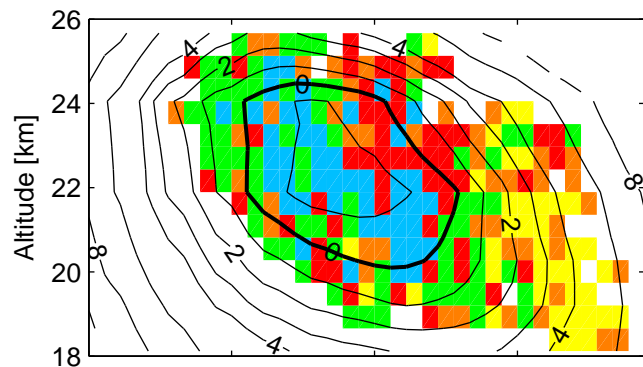

without; homogeneous

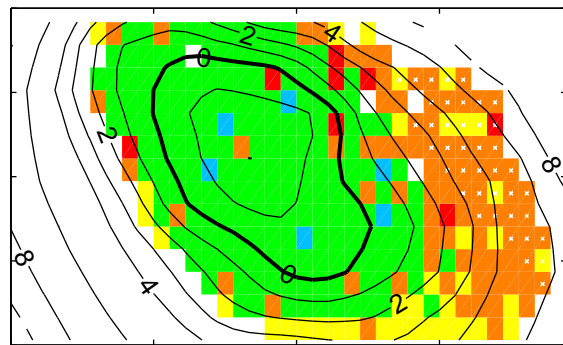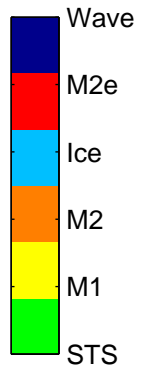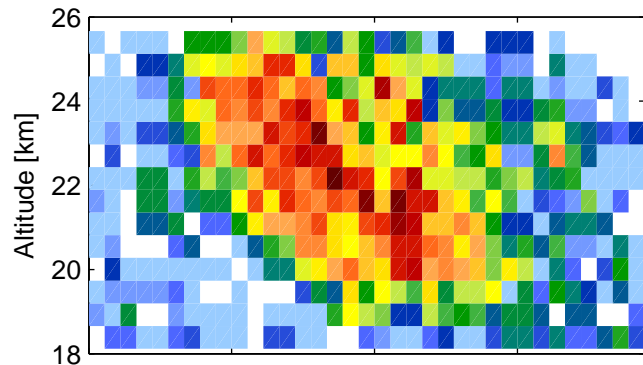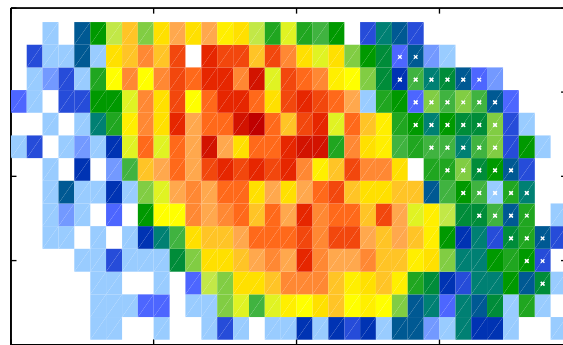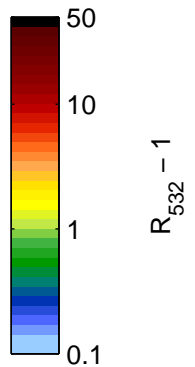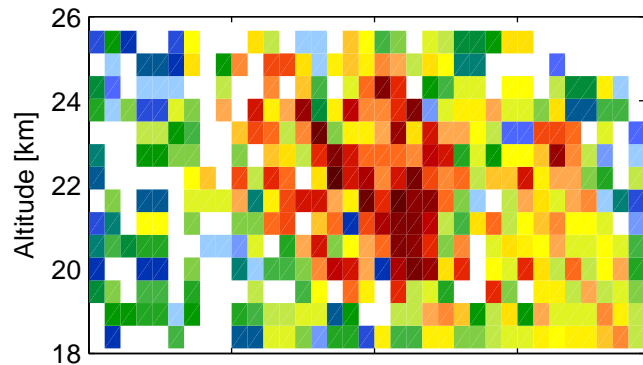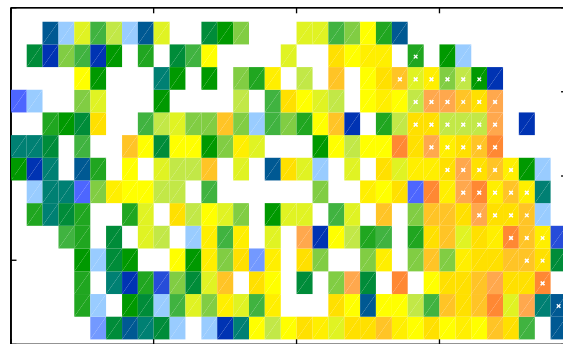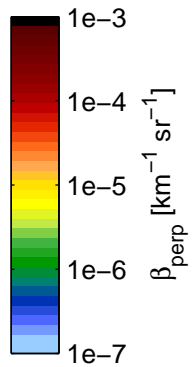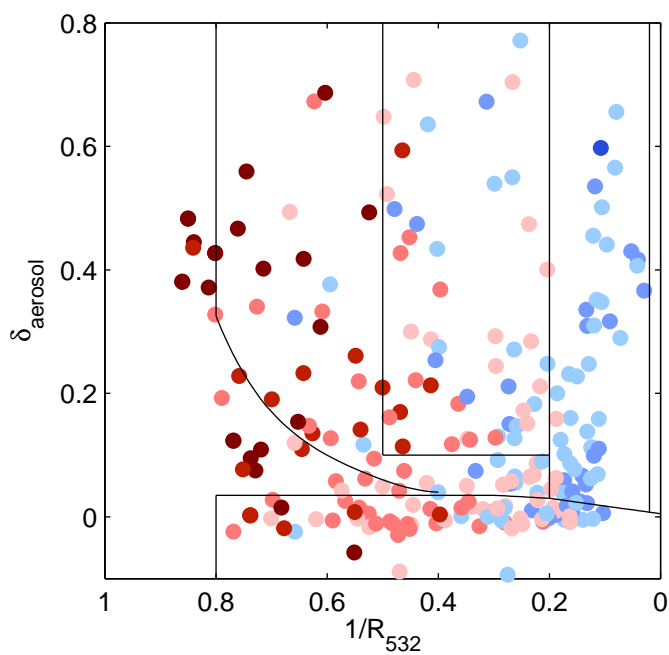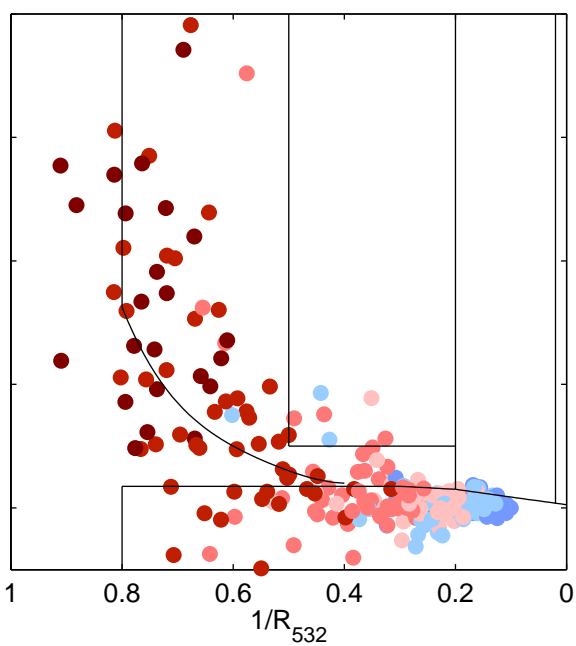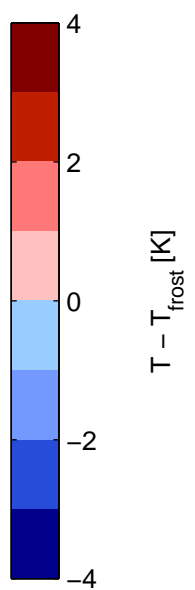

Supplement: Supplementary file 138 [file acp-13-10769-2013-supplement.zip]
